# Supplementary material for: Generation of twenty four induced pluripotent stem cell lines from twenty four members of the Lothian Birth Cohort 1936
Source: PubMed Central journal article supplement (PMC7347008; doi:10.1016/j.scr.2020.101851), 2020-07
Supplement: mmc1.pdf [file mmc1.pdf]

# Selection of iPSC line donors based on cognitive ageing

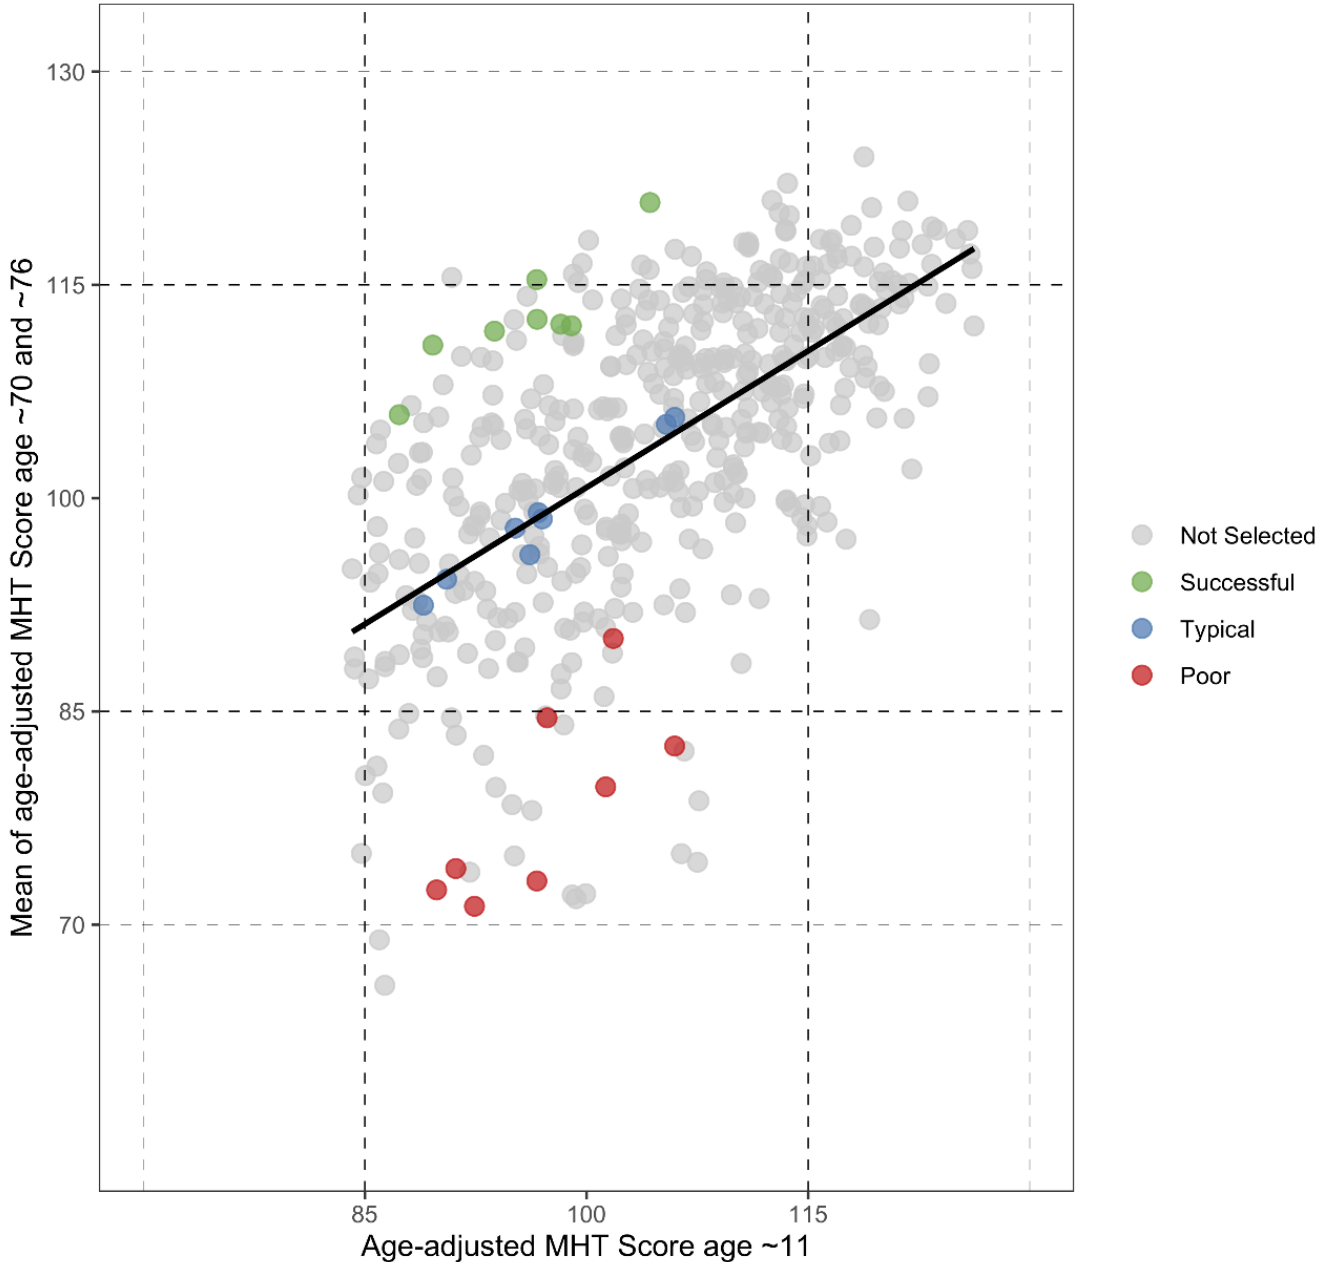

**sFig1:** Selection of iPSC candidates based on cognitive ageing profiles in the Lothian Birth Cohort 1936. Dashed lines are added to show  $\pm 1$ SD from the mean for the age 11 Moray House Test (MHT) score and  $\pm 1$  and 2SDs from the mean for later-life MHT score.

# sFig.2: Characterization for iPSC line EDi022-A

## A. AP

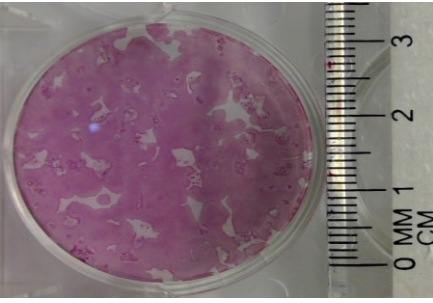

## B. Immunocytochemistry

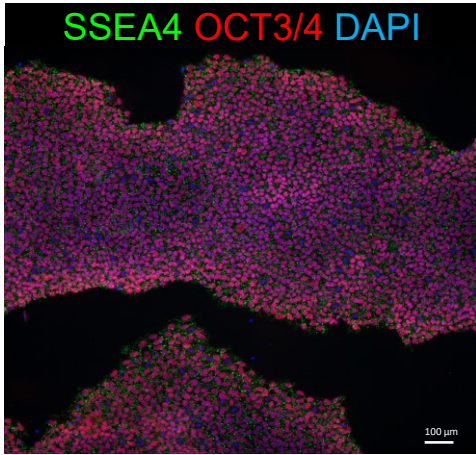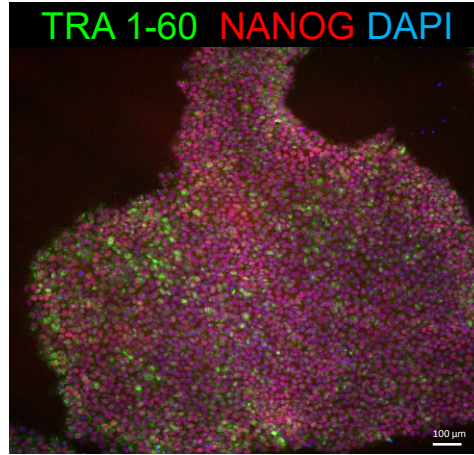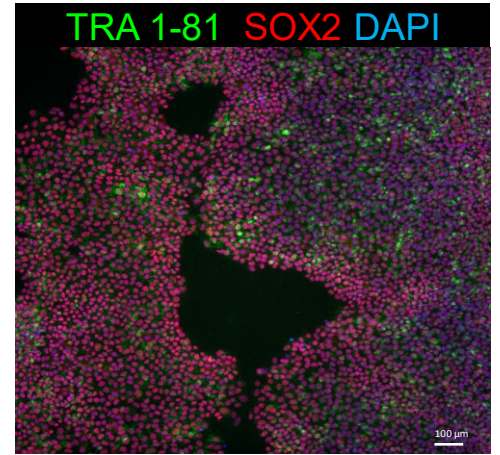

## C. PluriTest

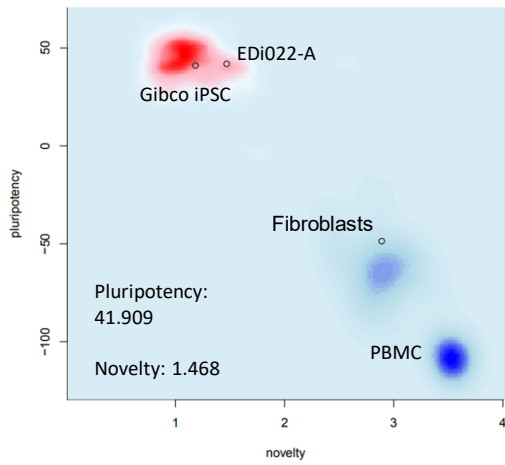

## D. G-Band karyotype

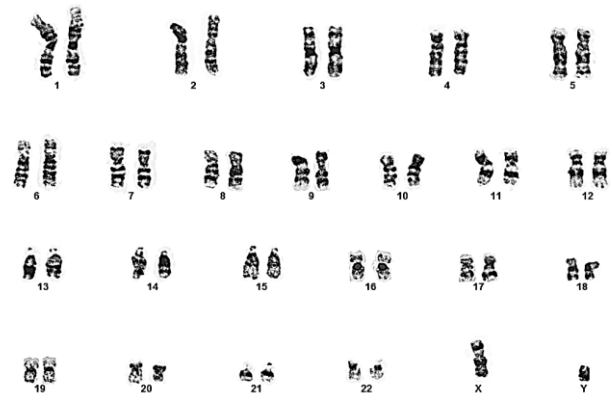

## E. hPSC Scorecard

| iPSCs      |       |      |       | Embryoid bodies |      |      |       |
|------------|-------|------|-------|-----------------|------|------|-------|
| Self-renew | Ecto  | Meso | Endo  | Self-renew      | Ecto | Meso | Endo  |
| +          | -     | -    | -     | -               | +    | +    | -     |
| 0.29       | -0.10 | 0.62 | -0.53 | -3.06           | 1.41 | 0.76 | -0.32 |

## F. Morphology

3 days post-thaw

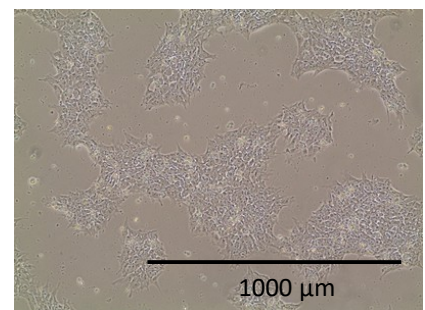

# sFig.3: Characterization for iPSC line EDi023-A

## A. AP

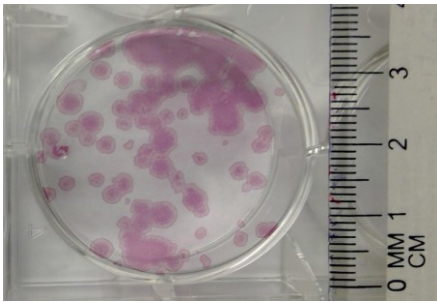

## B. Immunocytochemistry

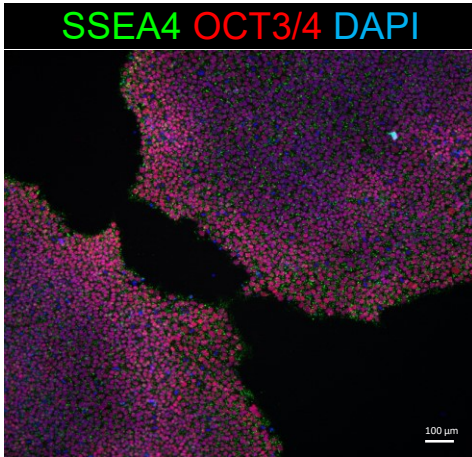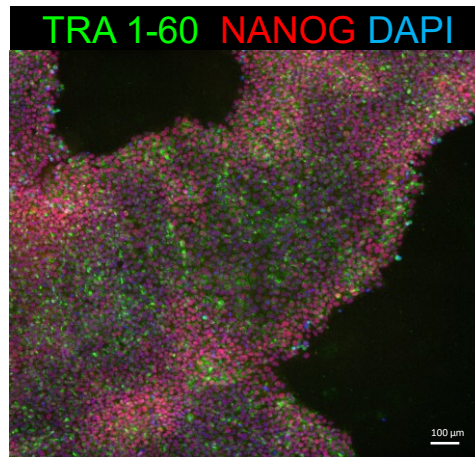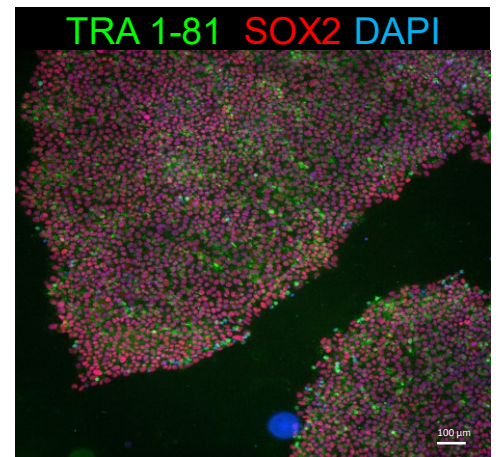

## C. PluriTest

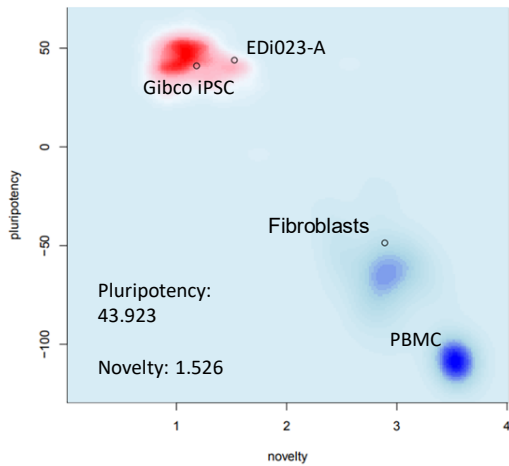

## D. G-Band karyotype

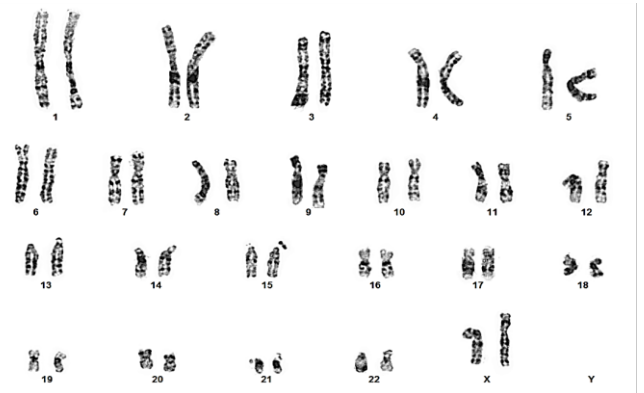

## E. hPSC Scorecard

| iPSCs      |       |      |       | Embryoid bodies |      |      |      |
|------------|-------|------|-------|-----------------|------|------|------|
| Self-renew | Ecto  | Meso | Endo  | Self-renew      | Ecto | Meso | Endo |
| +          | -     | -    | -     | -               | +    | +    | +    |
| 0.28       | -0.30 | 0.34 | -0.67 | -3.49           | 2.38 | 3.38 | 1.12 |

## F. Morphology 3 days post-thaw

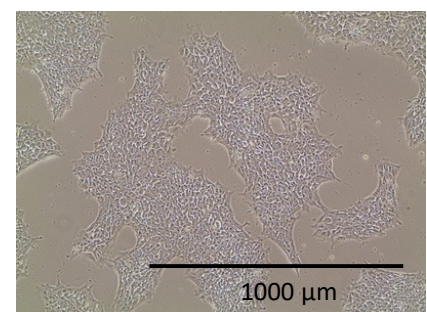

# sFig.4: Characterization for iPSC line EDi025-A

## A. AP

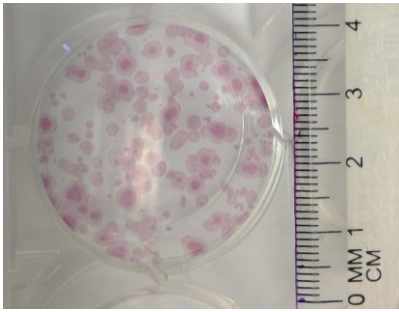

## B. Immunocytochemistry

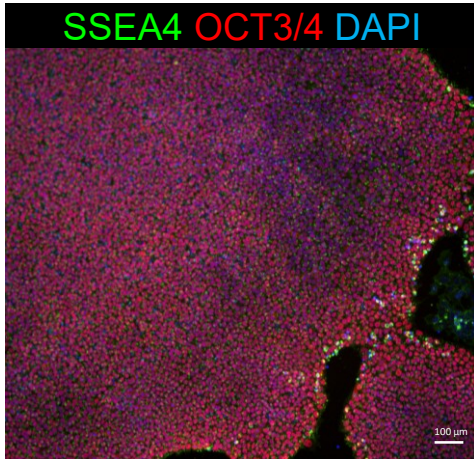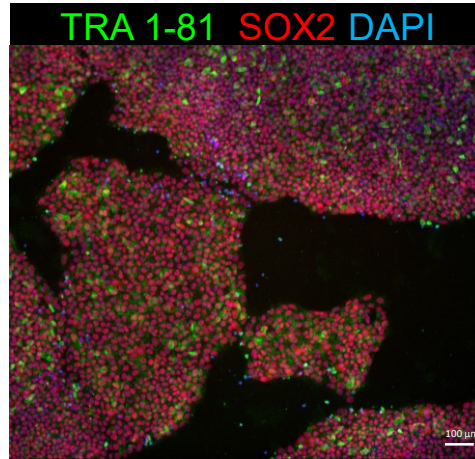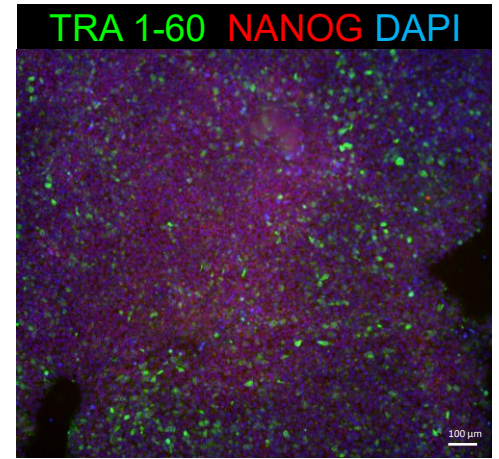

## C. PluriTest

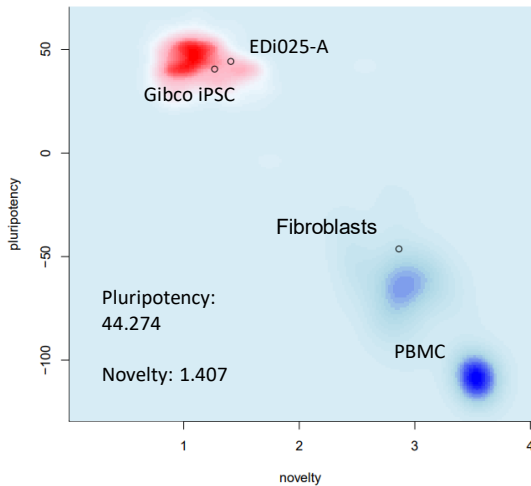

## D. G-Band karyotype

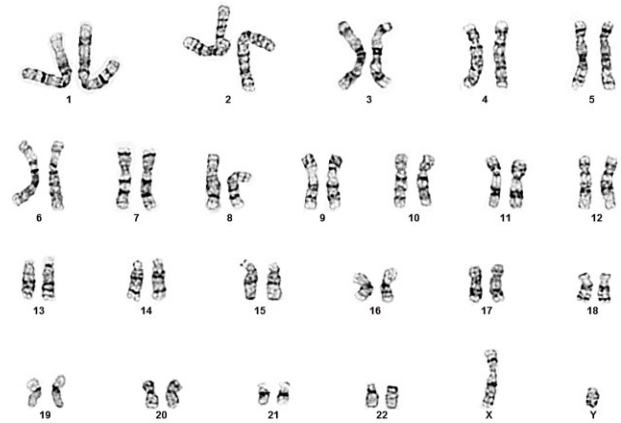

## E. hPSC Scorecard

| iPSCs      |       |       |       | Embryoid Bodies |      |      |      |
|------------|-------|-------|-------|-----------------|------|------|------|
| Self-renew | Ecto  | Meso  | Endo  | Self-renew      | Ecto | Meso | Endo |
| +          | -     | -     | -     | -               | +    | +    | +    |
| -0.01      | -0.33 | -0.39 | -1.15 | -7.29           | 1.49 | 2.19 | 0.57 |

## F. Morphology 2 days post-thaw

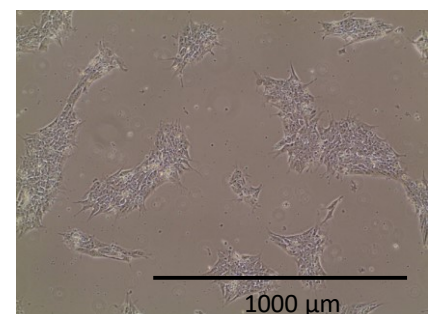

# sFig.5: Characterization for iPSC line EDi026-A

## A. AP

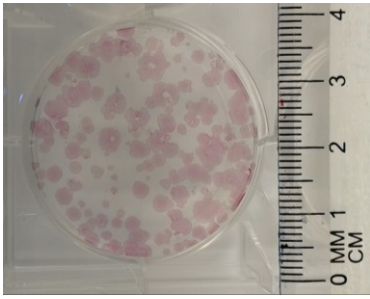

## B. Immunocytochemistry

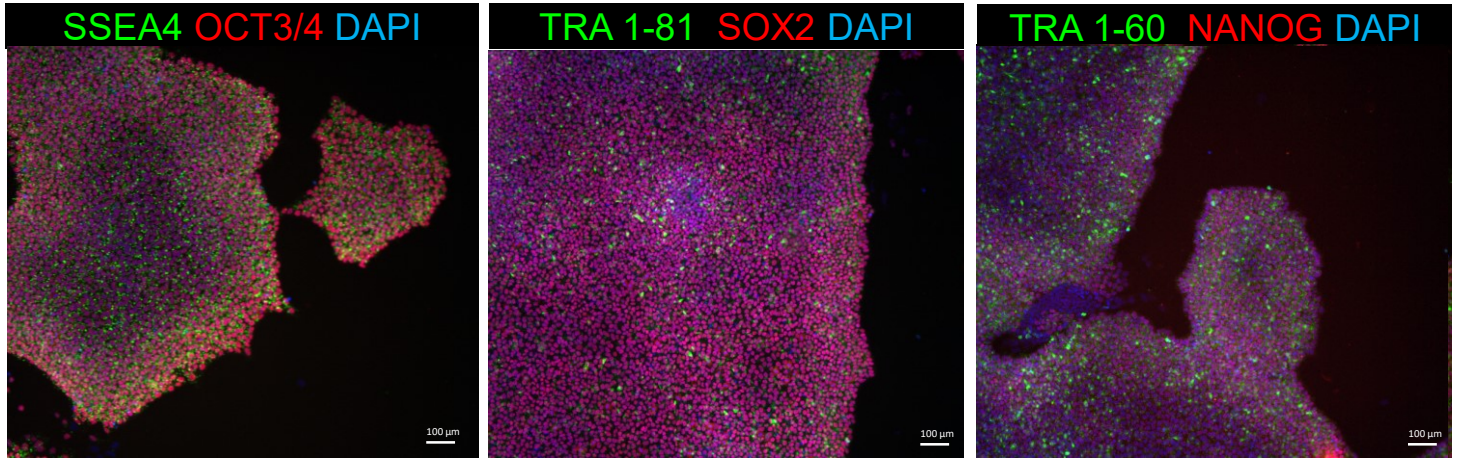

## C. Pluritest

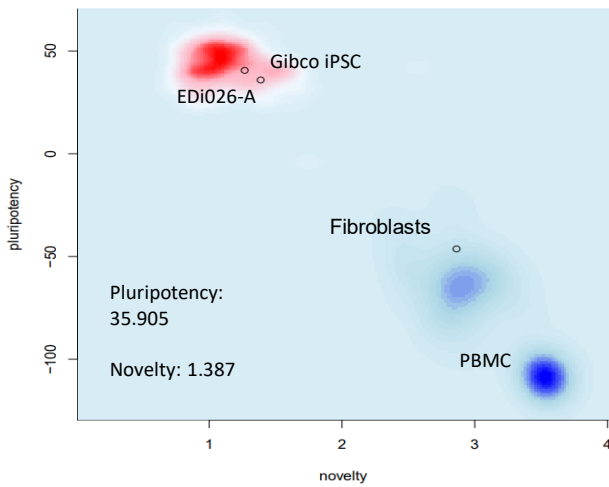

## D. G-Band karyotype

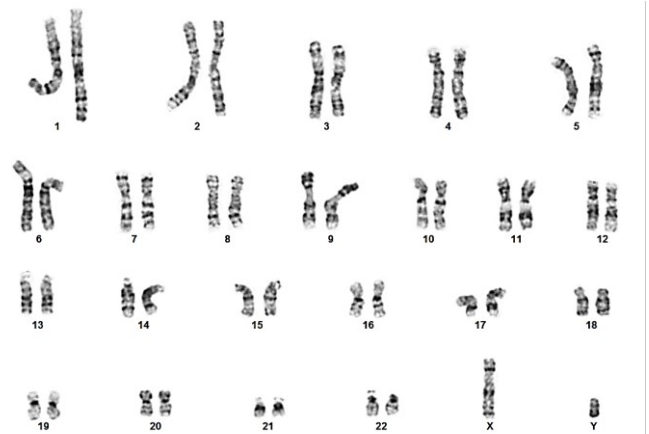

## E. hPSC Scorecard

| iPSCs      |      |      |       | Embryoid Bodies |      |      |      |
|------------|------|------|-------|-----------------|------|------|------|
| Self-renew | Ecto | Meso | Endo  | Self-renew      | Ecto | Meso | Endo |
| +          | -    | -    | -     | -               | +    | +    | +    |
| -0.41      | 0.50 | 0.42 | -0.83 | -6.72           | 1.74 | 1.19 | 0.69 |

## F. Morphology 2 days post-thaw

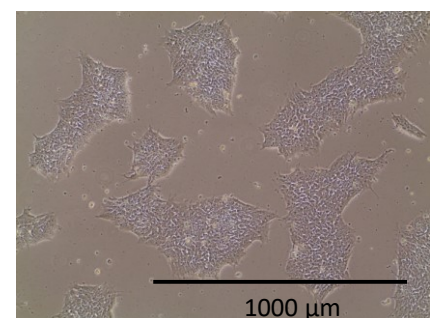

# sFig.6: Characterization for iPSC line EDi027-A

## A. AP

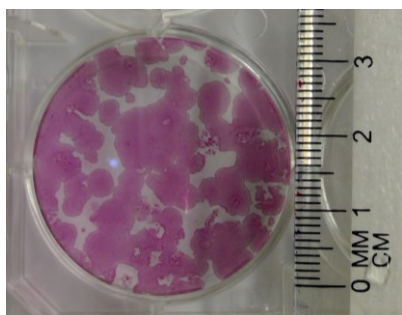

## B. Immunocytochemistry

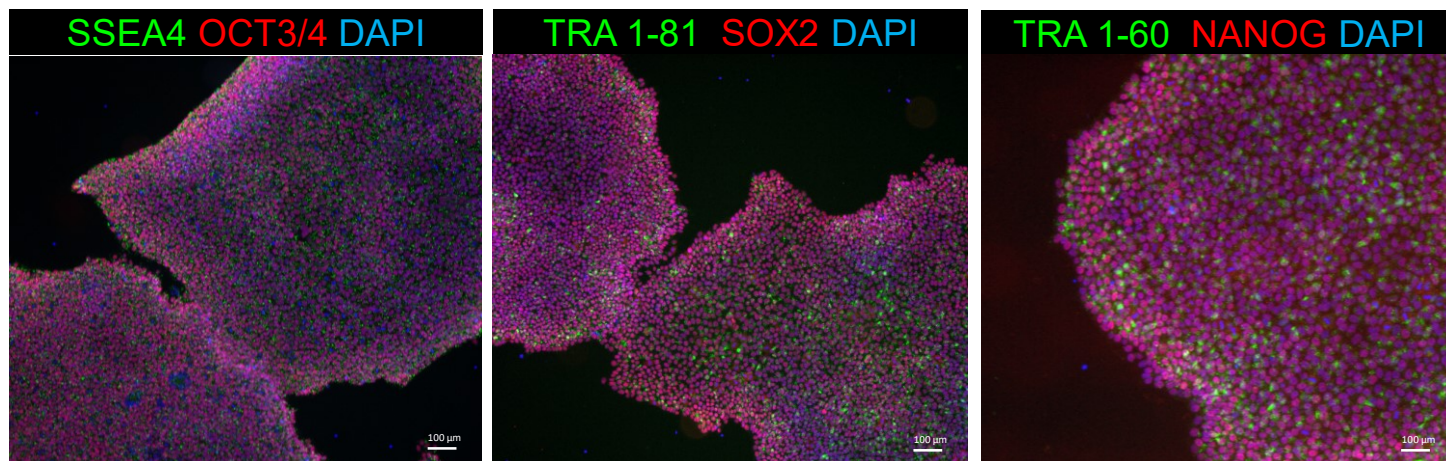

## C. Pluritest

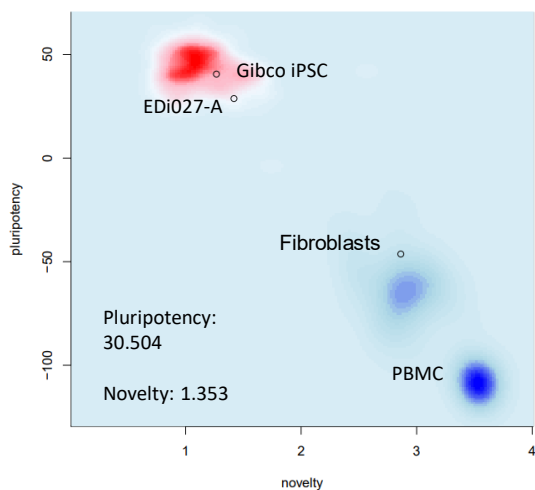

## D. G-Band karyotype

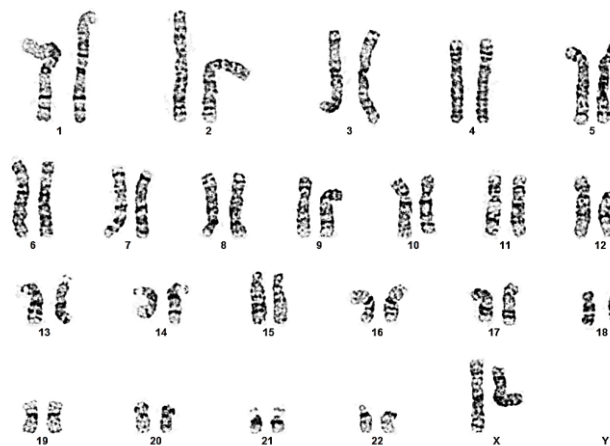

## E. hPSC Scorecard

| iPSCs      |      |      |       | Embryoid Bodies |       |       |       |
|------------|------|------|-------|-----------------|-------|-------|-------|
| Self-renew | Ecto | Meso | Endo  | Self-renew      | Ecto  | Meso  | Endo  |
| +          | ○    | -    | -     | -               | +     | +     | +     |
| 0.18       | 0.61 | 0.10 | -0.75 | -6.07           | -1.72 | -3.29 | -1.78 |

## F. Morphology 11 days post-thaw

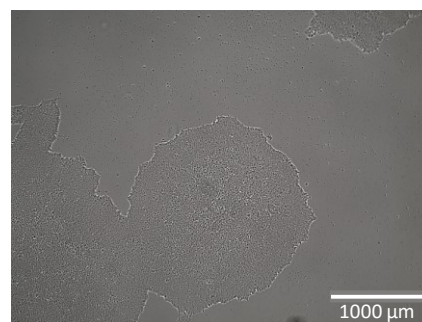

# sFig.7: Characterization for iPSC line EDi028-A

## A. AP

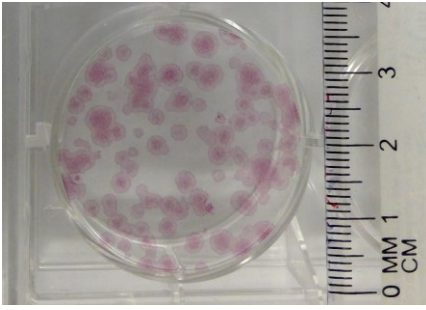

## B. Immunocytochemistry

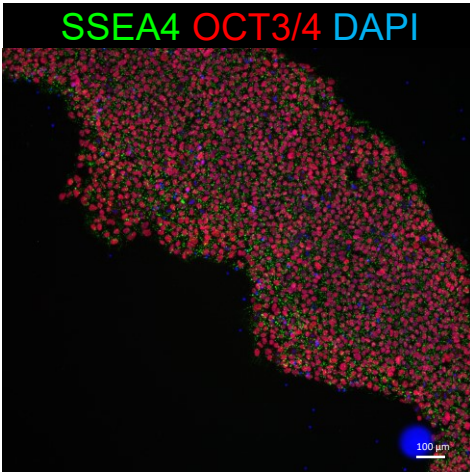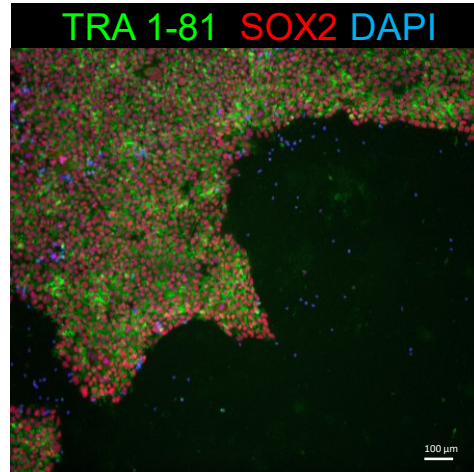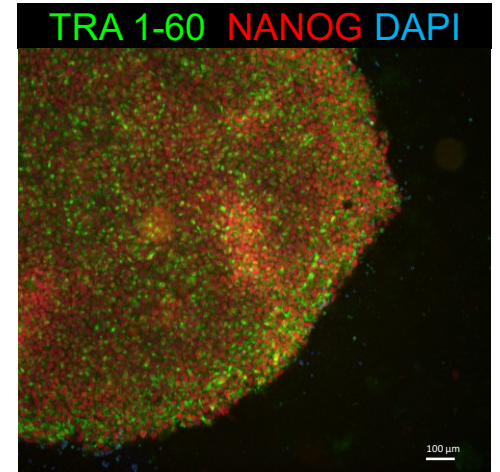

## C. Pluritest

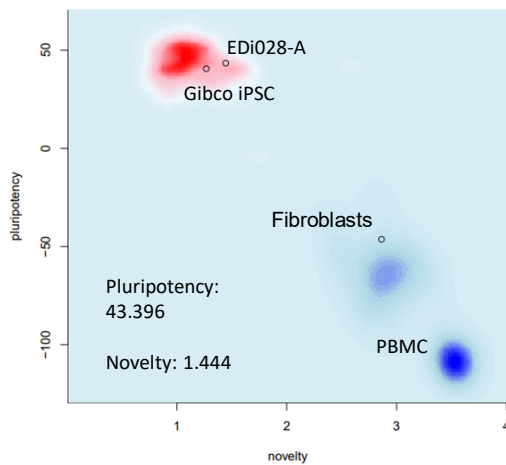

## D. G -Band karyotype

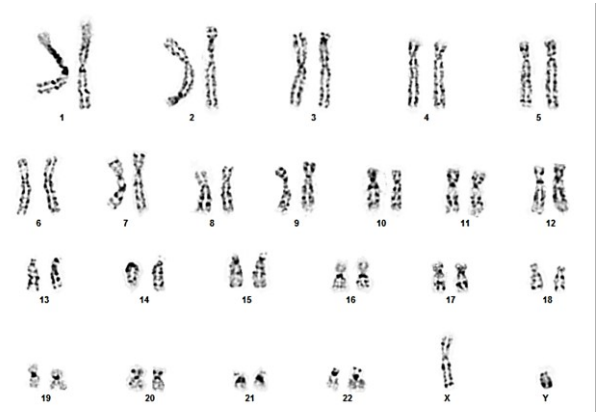

## E. hPSC Scorecard

| iPSCs      |       |      |       | Embryoid Bodies |      |      |      |
|------------|-------|------|-------|-----------------|------|------|------|
| Self-renew | Ecto  | Meso | Endo  | Self-renew      | Ecto | Meso | Endo |
| +          | -     | -    | -     | -               | +    | +    | +    |
| -0.17      | -0.17 | 0.69 | -1.00 | -6.84           | 2.14 | 2.10 | 0.69 |

## F. Morphology 2 days post-thaw

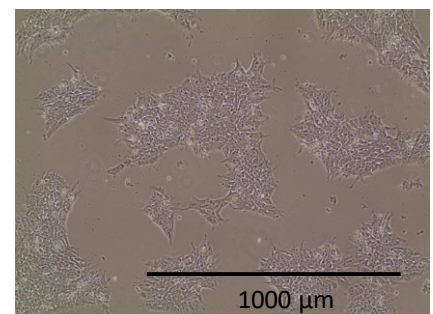

# sFig.8: Characterization for iPSC line EDi029-A

## A. AP

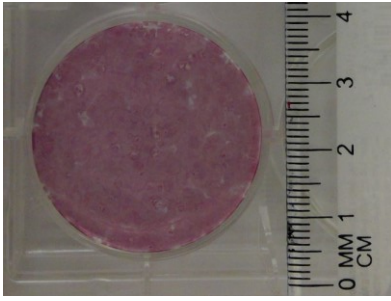

## B. Immunocytochemistry

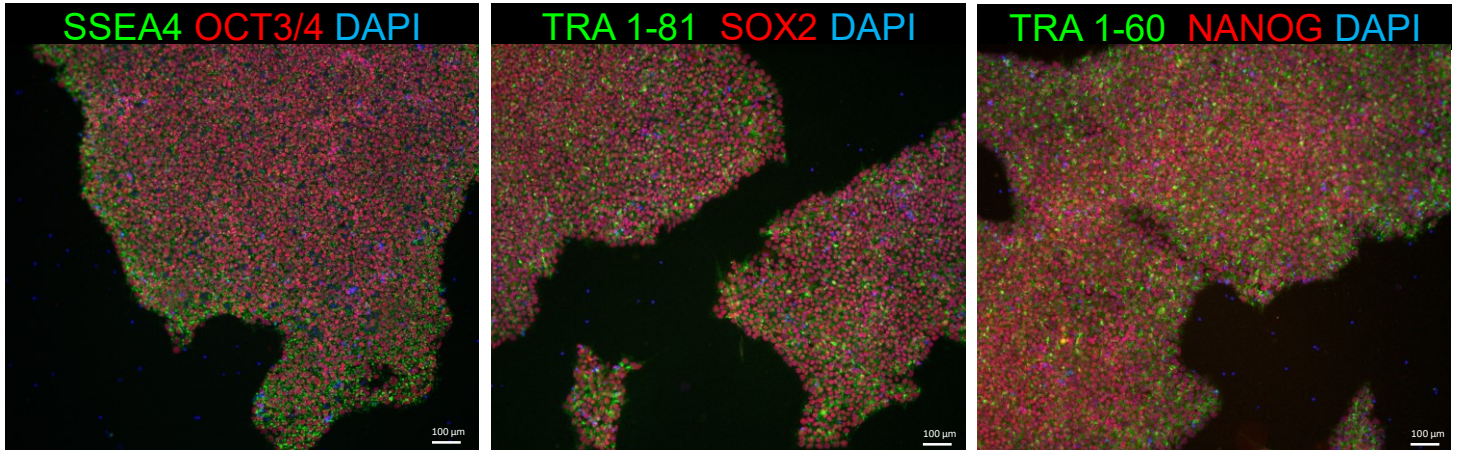

## C. Pluritest

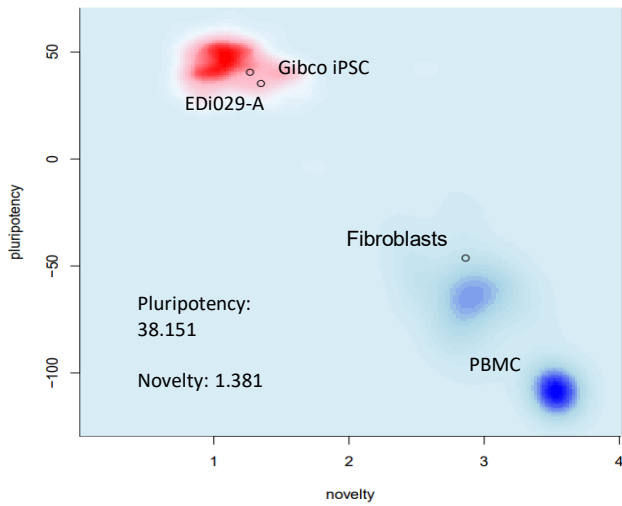

## D. G-Band karyotype

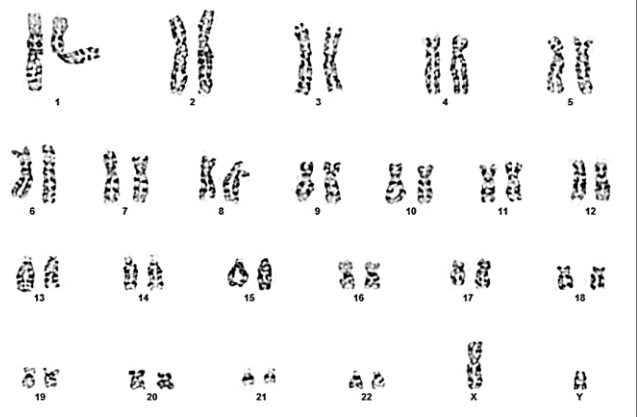

## E. hPSC Scorecard

| iPSCs      |      |      |       | Embryoid Bodies |      |      |      |
|------------|------|------|-------|-----------------|------|------|------|
| Self-renew | Ecto | Meso | Endo  | Self-renew      | Ecto | Meso | Endo |
| +          | -    | -    | -     | -               | +    | +    | +    |
| 0.75       | 0.33 | 0.37 | -0.81 | -5.16           | 2.13 | 3.91 | 1.96 |

## F. Morphology 4 days post-thaw

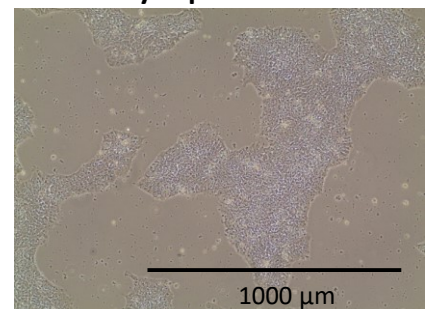



# sFig.9: Characterization for iPSC line EDi030-A

## A. AP

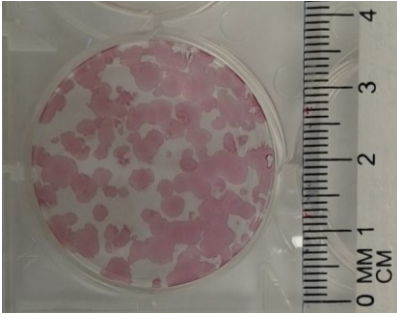

## B. Immunocytochemistry

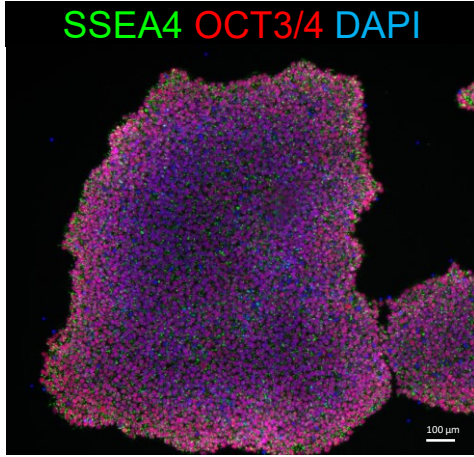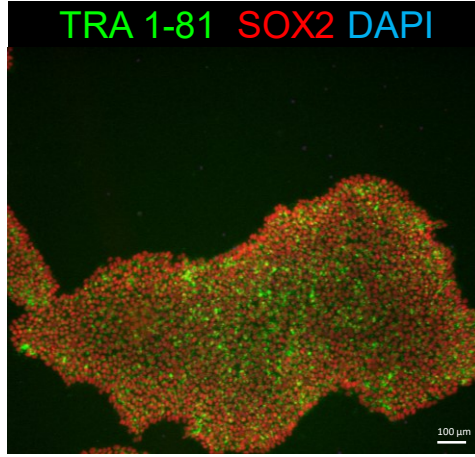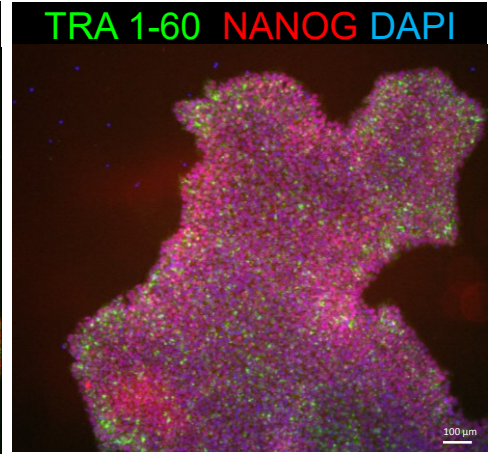

## C. Pluritest

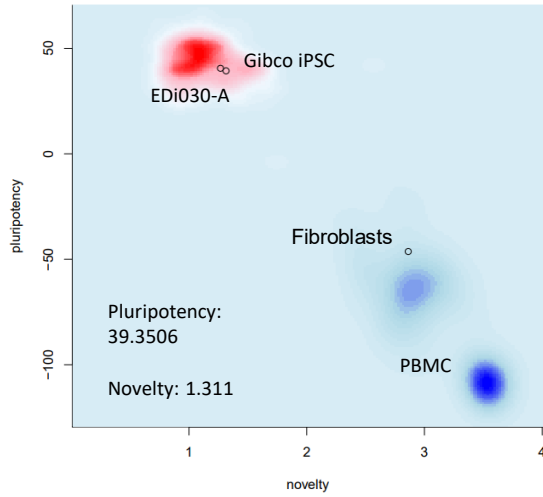

## D. G-Band karyotype

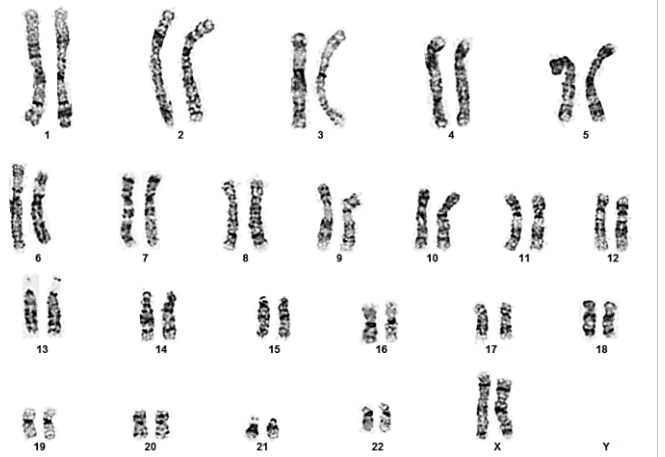

## E. hPSC Scorecard

| iPSCs      |      |      |       | Embryoid Bodies |      |      |      |
|------------|------|------|-------|-----------------|------|------|------|
| Self-renew | Ecto | Meso | Endo  | Self-renew      | Ecto | Meso | Endo |
| +          | -    | -    | -     | -               | +    | +    | +    |
| -0.30      | 0.07 | 0.54 | -1.48 | -5.34           | 1.72 | 5.14 | 1.95 |

## F. Morphology 2 days post-thaw

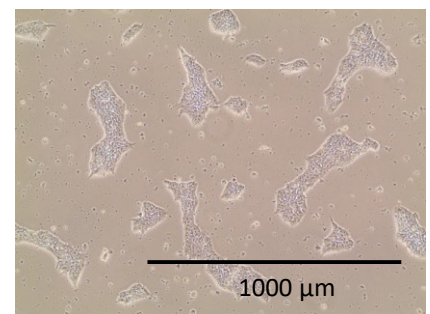

# sFig.10: Characterization for iPSC line EDi031-A

## A. AP

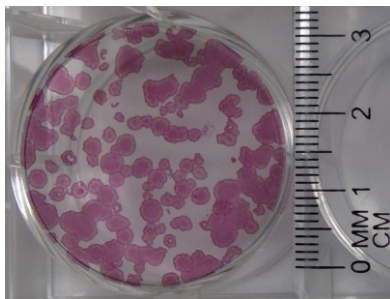

## B. Immunocytochemistry

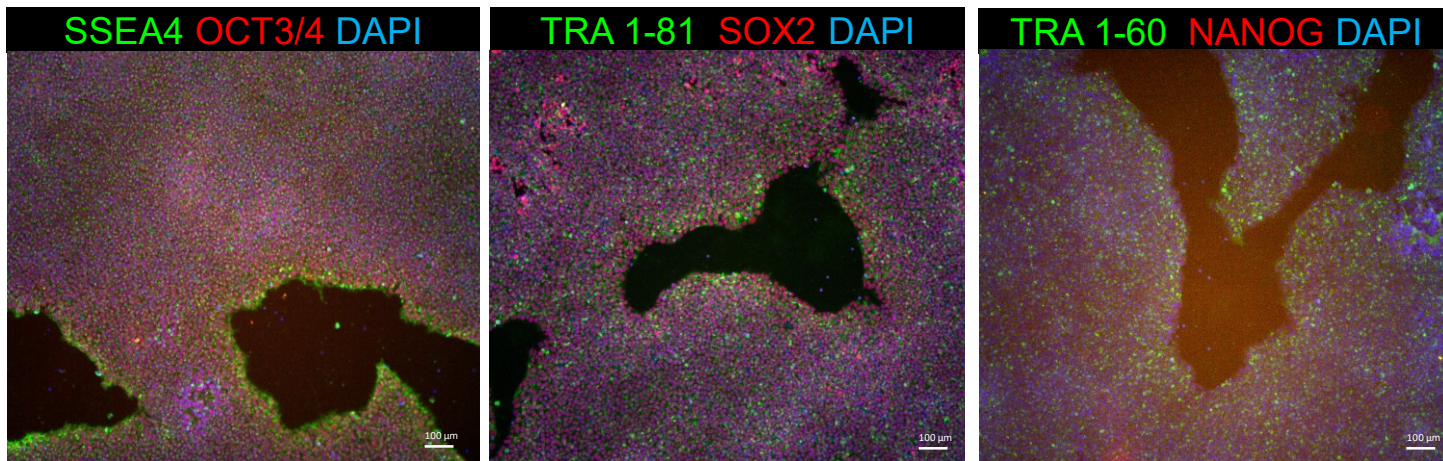

## C. Pluritest

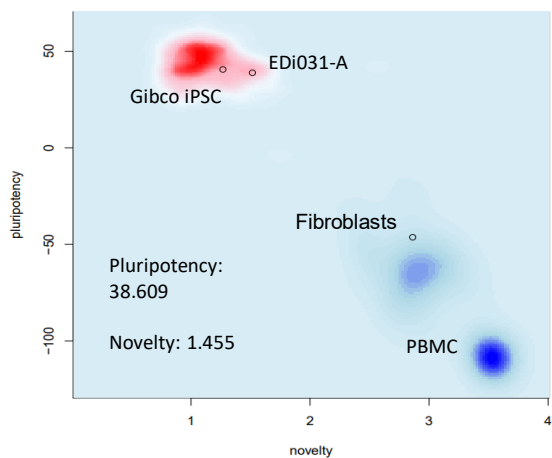

## D. G-Band karyotype

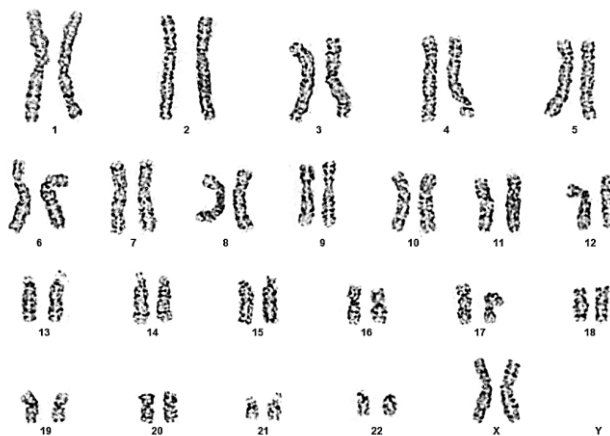

## E. hPSC Scorecard

| iPSCs      |       |       |       | Embryoid Bodies |      |      |      |
|------------|-------|-------|-------|-----------------|------|------|------|
| Self-renew | Ecto  | Meso  | Endo  | Self-renew      | Ecto | Meso | Endo |
| +          | -     | -     | -     | -               | +    | +    | +    |
| -0.19      | -0.46 | -0.24 | -1.30 | -6.33           | 1.77 | 2.65 | 1.65 |

## F. Morphology 2 days post-thaw

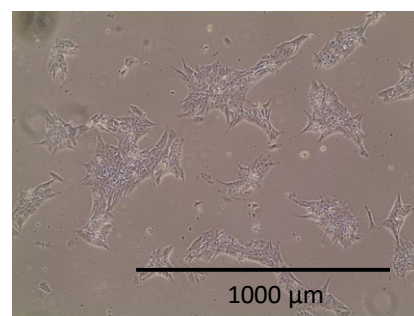

# sFig.11: Characterization for iPSC line EDi032-A

## A. AP

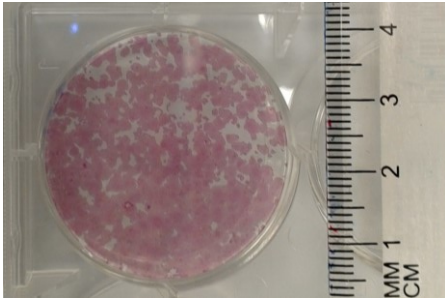

## B. Immunocytochemistry

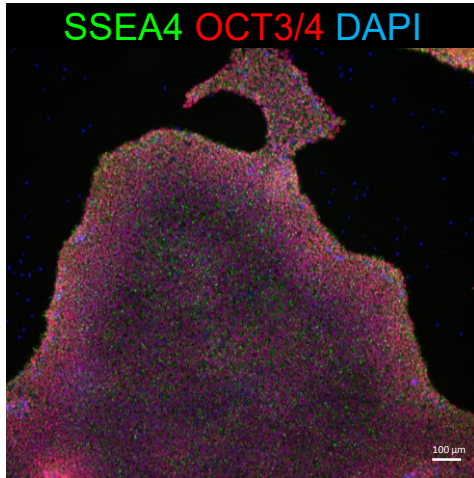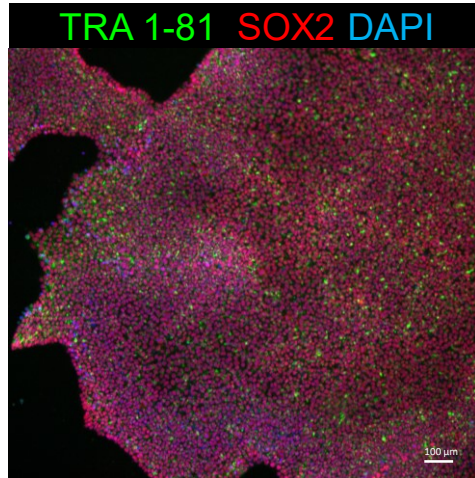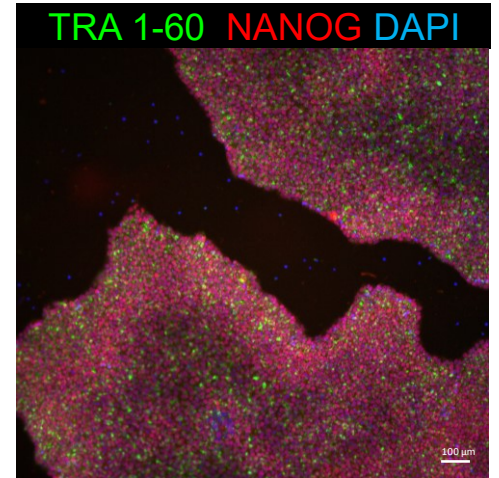

## C. Pluritest

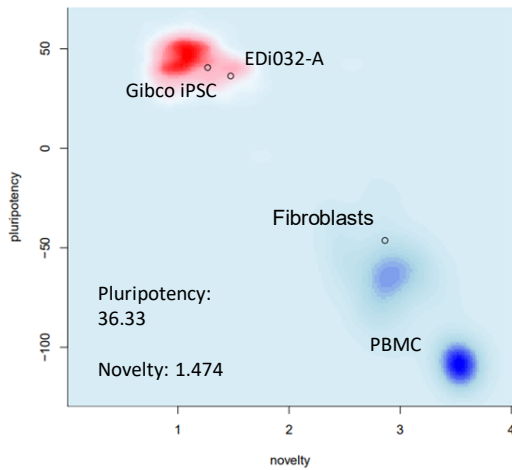

## D. G -Band karyotype

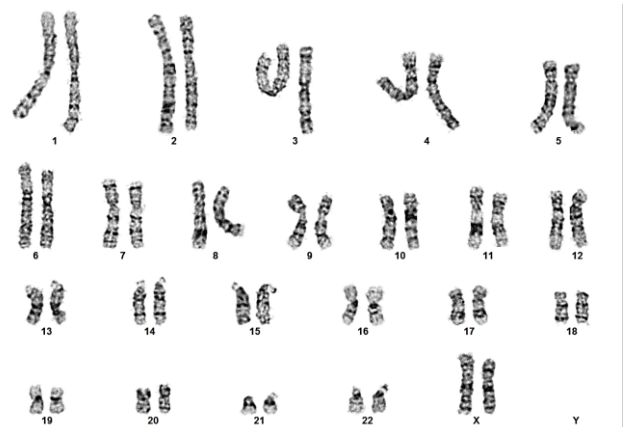

## E. hPSC Scorecard

| iPSCs      |       |      |       | Embryoid Bodies |      |      |      |
|------------|-------|------|-------|-----------------|------|------|------|
| Self-renew | Ecto  | Meso | Endo  | Self-renew      | Ecto | Meso | Endo |
| +          | -     | -    | -     | -               | +    | +    | +    |
| 0.24       | -0.06 | 0.08 | -1.36 | -6.85           | 1.85 | 2.34 | 0.78 |

## F. Morphology

4 days post-thaw

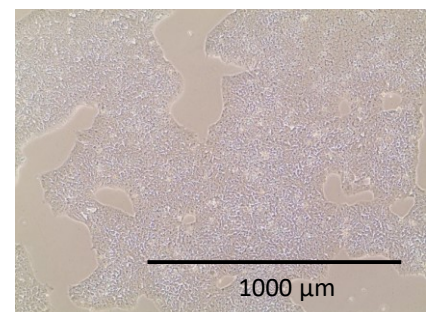

# sFig.12: Characterization for iPSC line EDi033-A

## A. AP

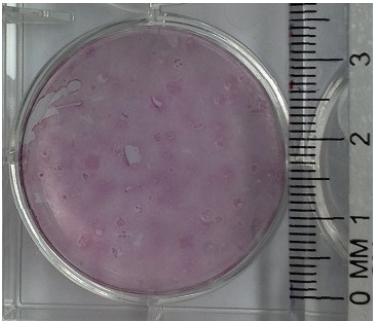

## B. Immunocytochemistry

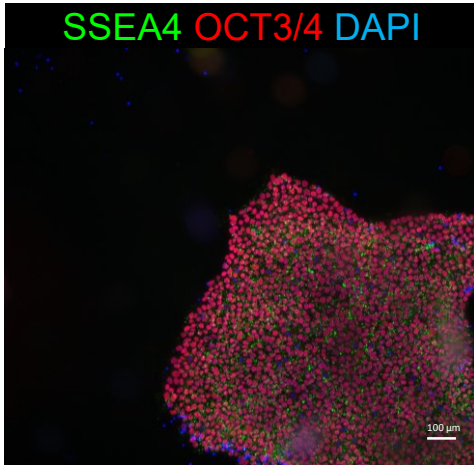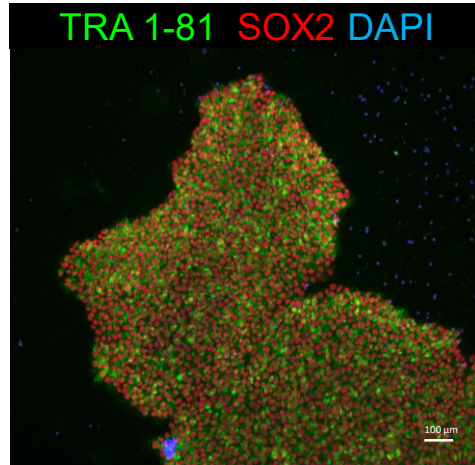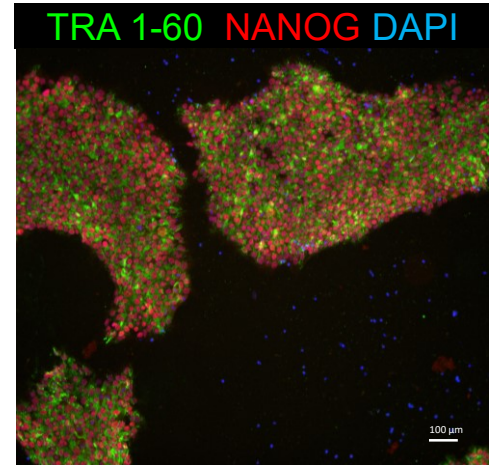

## C. Pluritest

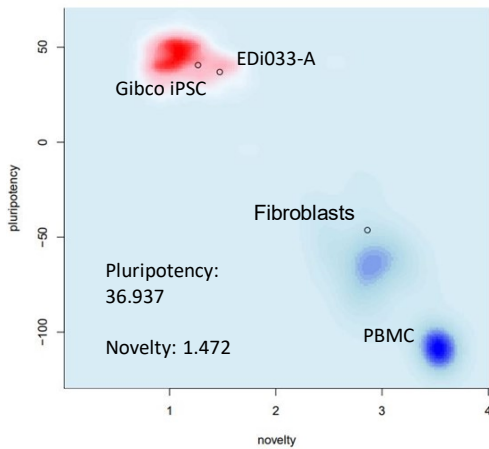

## D. G -Band karyotype

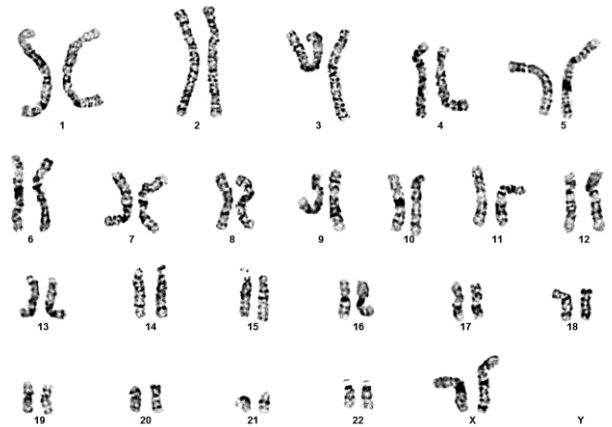

## E. hPSC Scorecard

| iPSCs      |       |       |       | Embryoid Bodies |      |      |      |
|------------|-------|-------|-------|-----------------|------|------|------|
| Self-renew | Ecto  | Meso  | Endo  | Self-renew      | Ecto | Meso | Endo |
| +          | -     | -     | -     | -               | +    | +    | +    |
| 0.23       | -0.02 | -0.18 | -1.03 | -3.58           | 1.77 | 3.93 | 1.85 |

## F. Morphology

7 days post-thaw

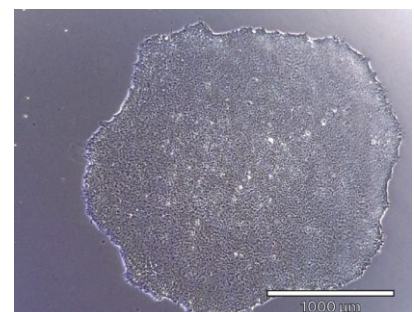

# sFig.13: Characterization for iPSC line EDi034-A

## A. AP

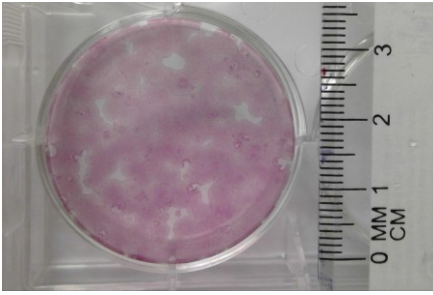

## B. Immunocytochemistry

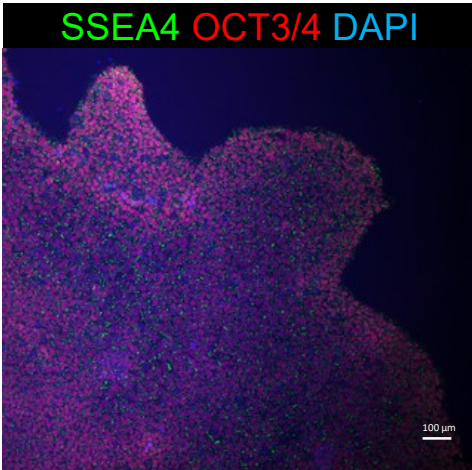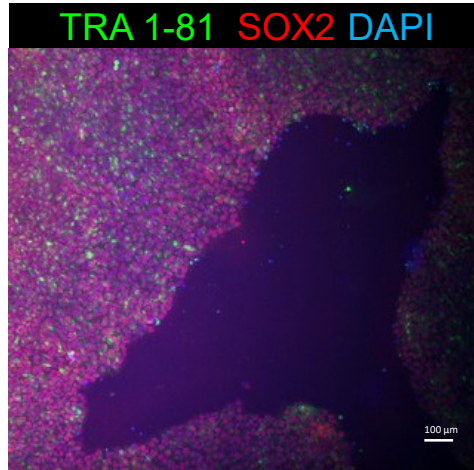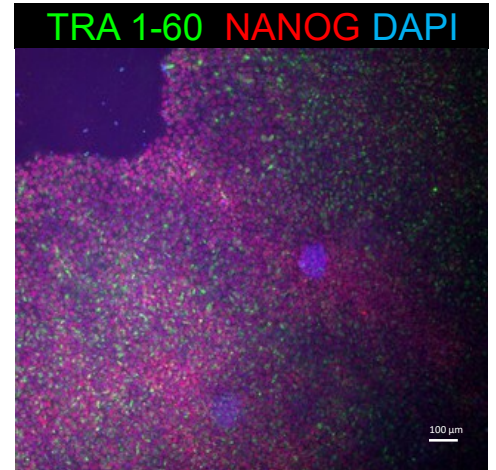

## C. Pluritest

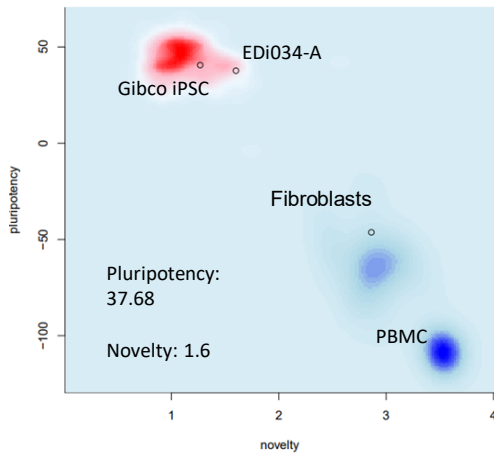

## D. G -Band karyotype

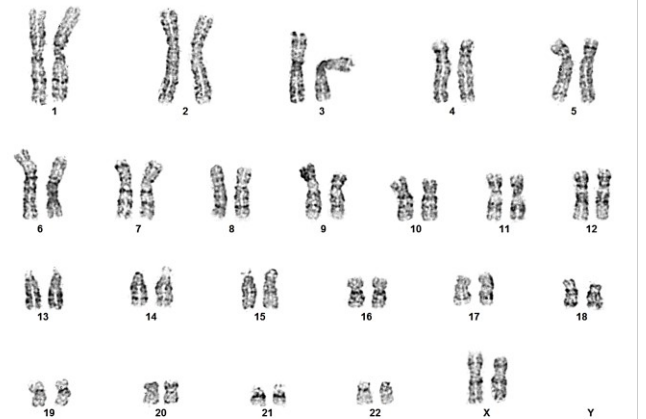

## E. hPSC Scorecard

| iPSCs      |       |       |       | Embryoid Bodies |      |      |      |
|------------|-------|-------|-------|-----------------|------|------|------|
| Self-renew | Ecto  | Meso  | Endo  | Self-renew      | Ecto | Meso | Endo |
| +          | -     | -     | -     | -               | +    | +    | +    |
| 0.77       | -0.25 | -0.22 | -1.57 | -4.24           | 2.56 | 3.43 | 1.67 |

## F. Morphology 2 days post-thaw

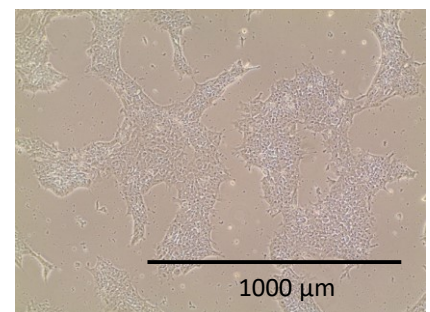

# sFig.14: Characterization for iPSC line EDI035-A

## A. AP

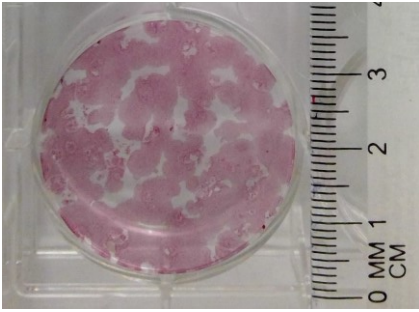

## B. Immunocytochemistry

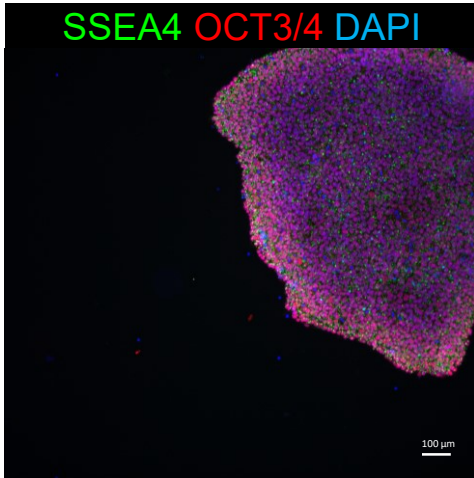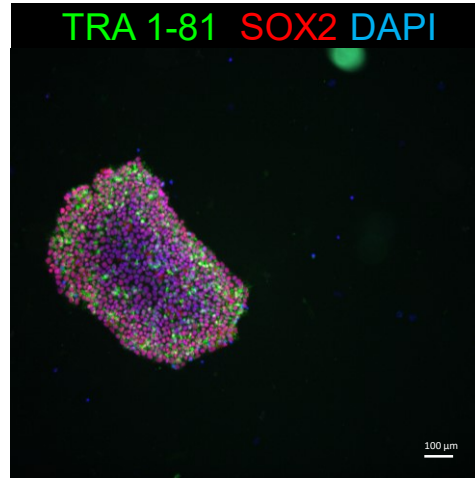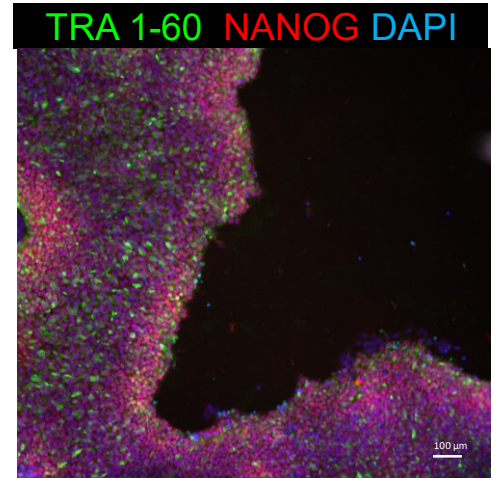

## C. Pluritest

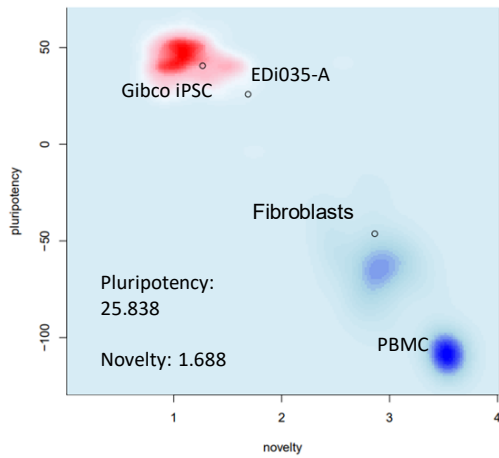

## D. G -Band karyotype

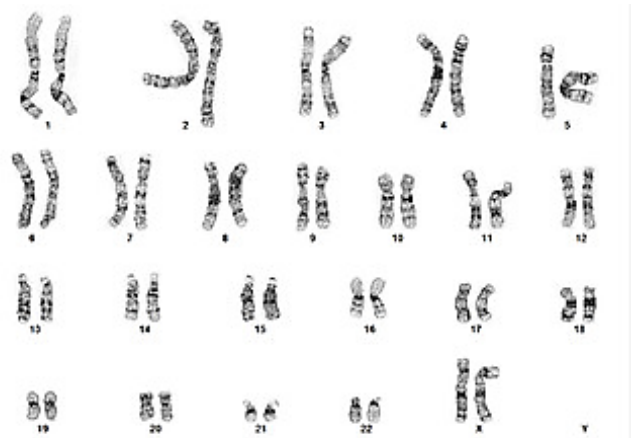

## E. hPSC Scorecard

| iPSCs      |      |      |       | Embryoid Bodies |      |      |      |
|------------|------|------|-------|-----------------|------|------|------|
| Self-renew | Ecto | Meso | Endo  | Self-renew      | Ecto | Meso | Endo |
| +          | -    | -    | -     | -               | +    | -    | ○    |
| 0.39       | 0.19 | 0.02 | -1.22 | -6.69           | 1.81 | 0.64 | 0.29 |

## F. Morphology 7 days post-thaw

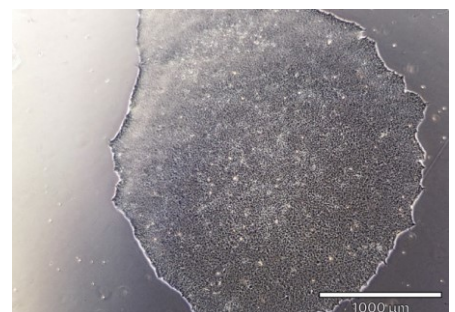

# sFig.15: Characterization for iPSC line EDI036-A

## A. AP

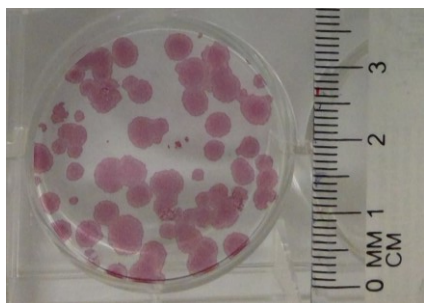

## B. Immunocytochemistry

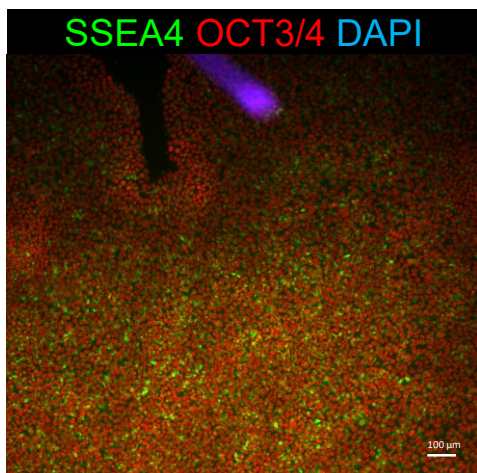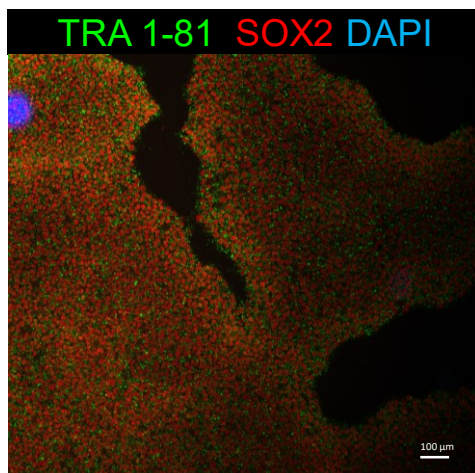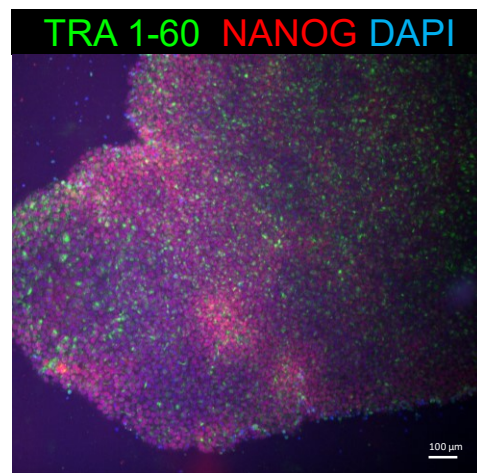

## C. Pluritest

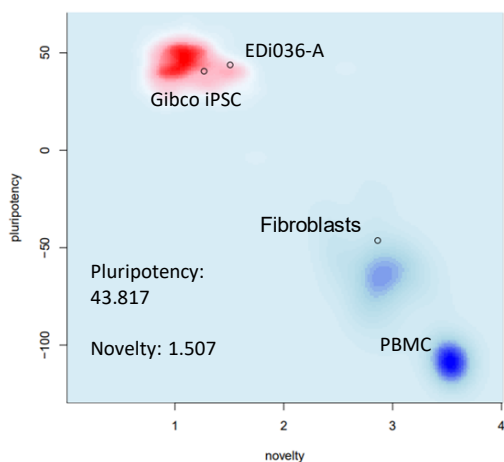

## D. G -Band karyotype

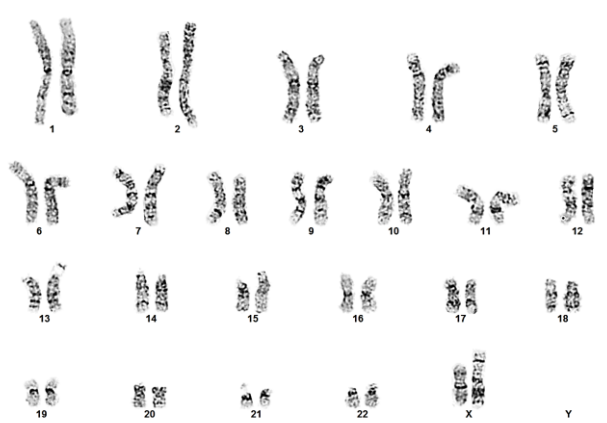

## E. hPSC Scorecard

| iPSCs      |      |      |       | Embryoid Bodies |      |      |      |
|------------|------|------|-------|-----------------|------|------|------|
| Self-renew | Ecto | Meso | Endo  | Self-renew      | Ecto | Meso | Endo |
| +          | -    | -    | -     | -               | +    | +    | +    |
| 0.50       | 0.37 | 0.20 | -1.03 | -6.35           | 1.90 | 1.61 | 0.66 |

## F. Morphology

2 days post-thaw

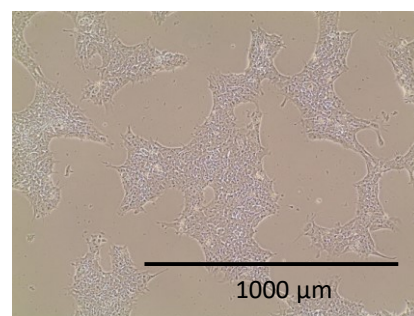

# sFig.16: Characterization for iPSC line EDi037-A

## A. AP

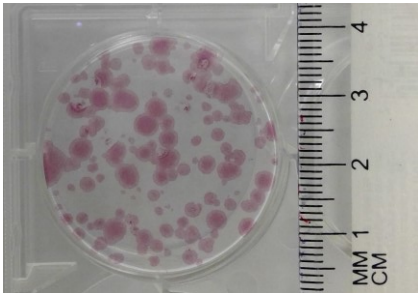

## B. Immunocytochemistry

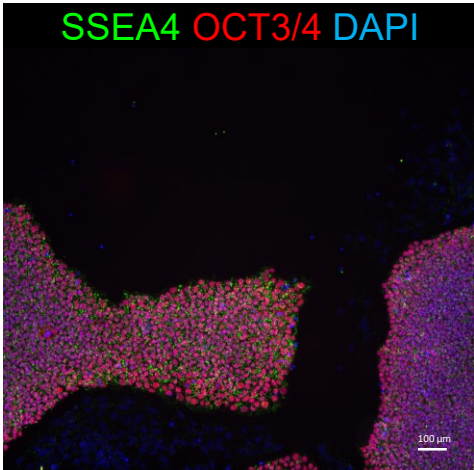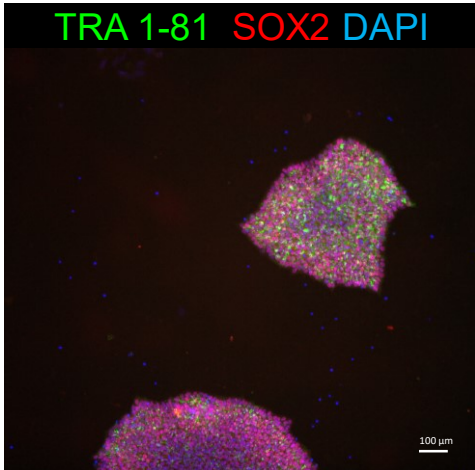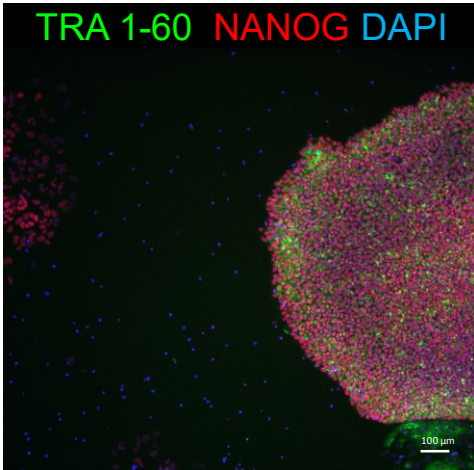

## C. Pluritest

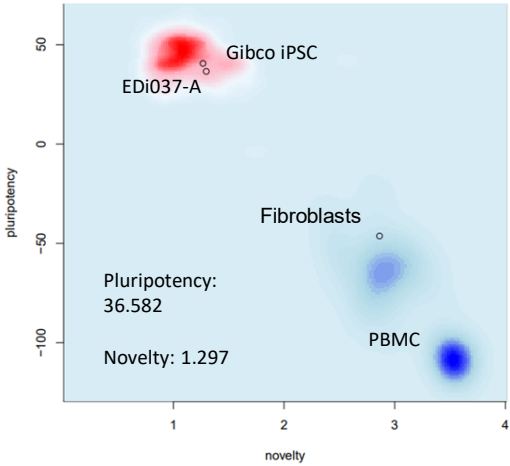

## D. G -Band karyotype

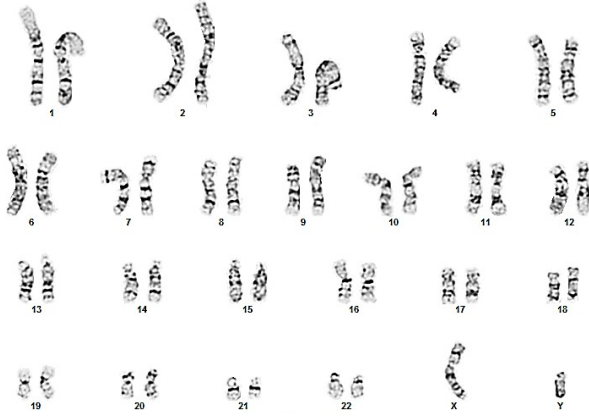

## E. hPSC Scorecard

| iPSCs      |      |      |       | Embryoid Bodies |      |      |      |
|------------|------|------|-------|-----------------|------|------|------|
| Self-renew | Ecto | Meso | Endo  | Self-renew      | Ecto | Meso | Endo |
| +          | -    | -    | -     | -               | +    | +    | +    |
| 0.05       | 0.20 | 0.05 | -0.75 | -7.38           | 1.65 | 1.80 | 0.87 |

## F. Morphology 2 days post-thaw

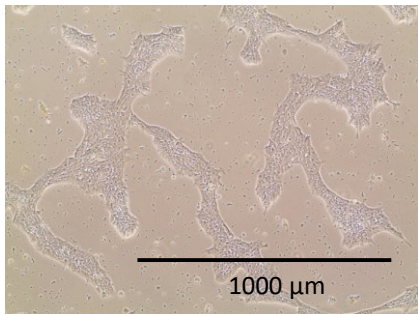



# sFig.17: Characterization for iPSC line EDi038-A

## A. AP

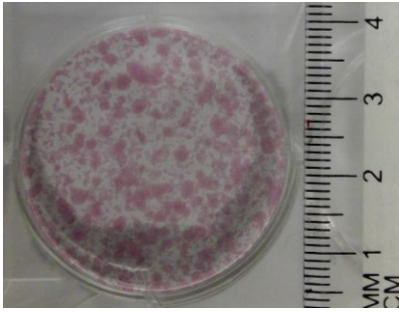

## B. Immunocytochemistry

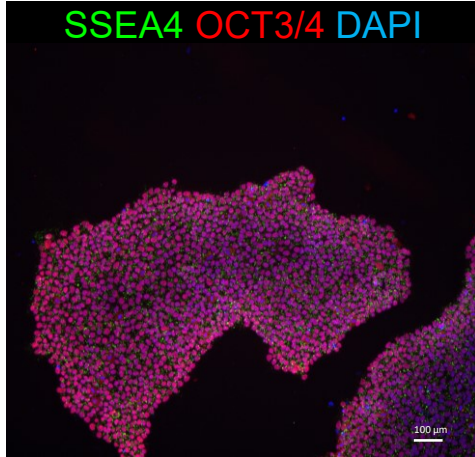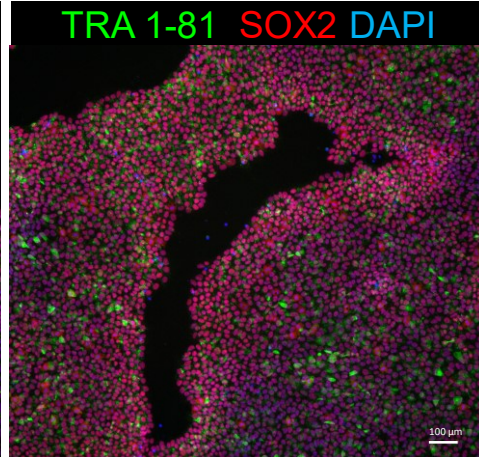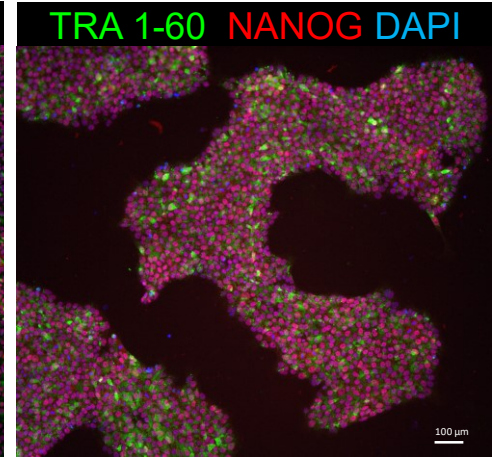

## C. Pluritest

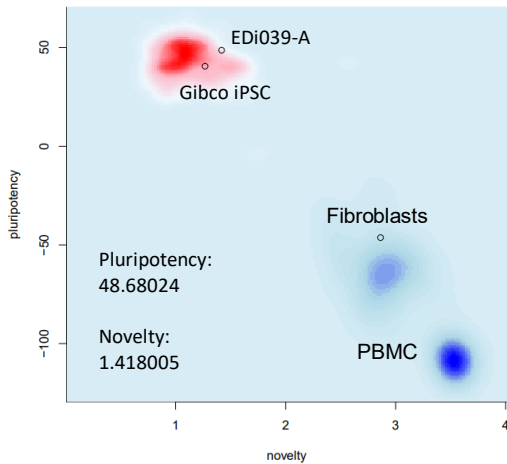

## D. G-Band karyotype

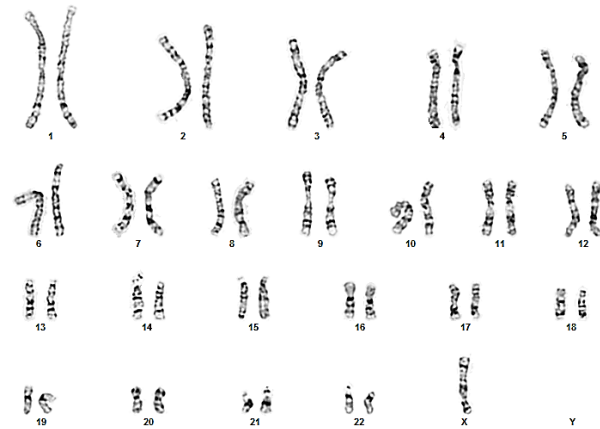

## E. hPSC Scorecard

| iPSCs      |       |      |       | Embryoid Bodies |      |      |      |
|------------|-------|------|-------|-----------------|------|------|------|
| Self-renew | Ecto  | Meso | Endo  | Self-renew      | Ecto | Meso | Endo |
| +          | -     | -    | -     | -               | +    | +    | +    |
| 0.61       | -0.09 | 0.48 | -1.10 | -6.22           | 1.41 | 6.00 | 1.73 |

## F. Morphology 11 days post-thaw

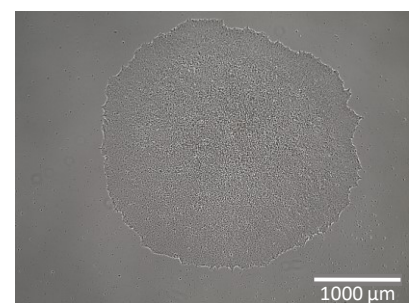

# sFig.18: Characterization for iPSC line EDi039-A

## A. AP

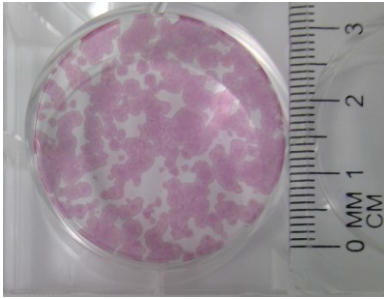

## B. Immunocytochemistry

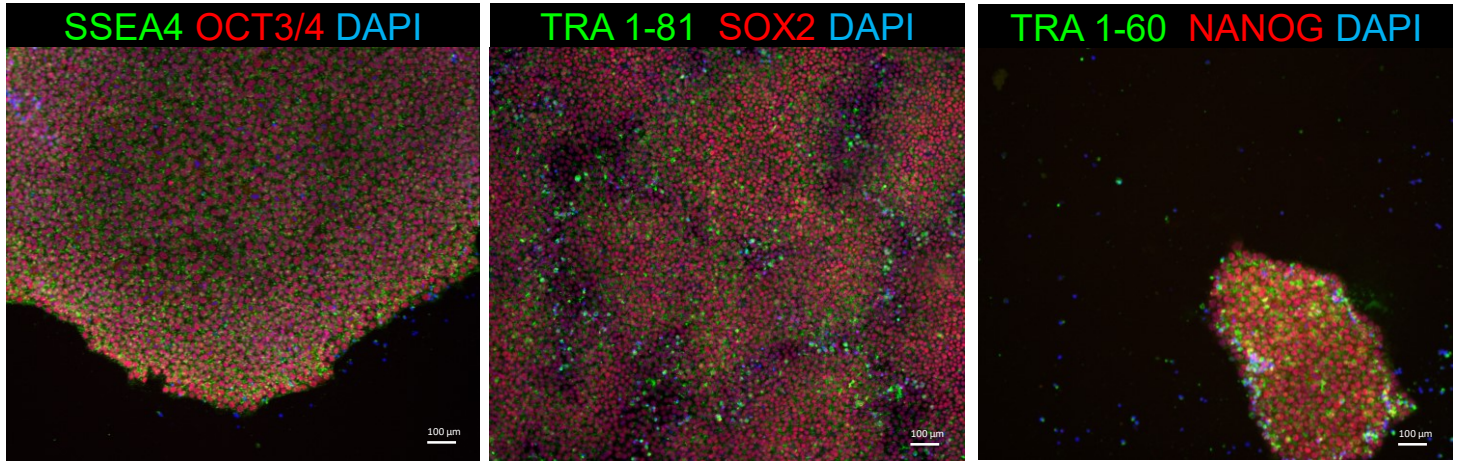

## C. PluriTest

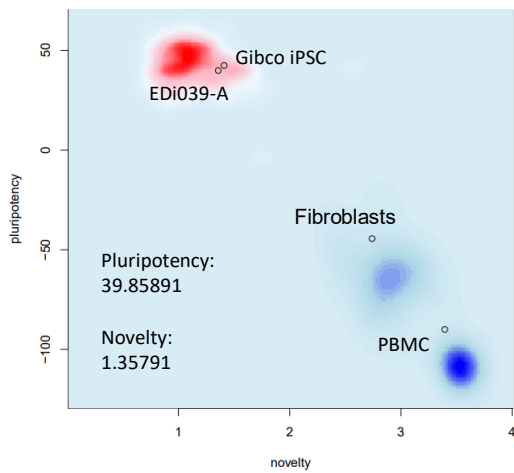

## D. G-Band karyotype

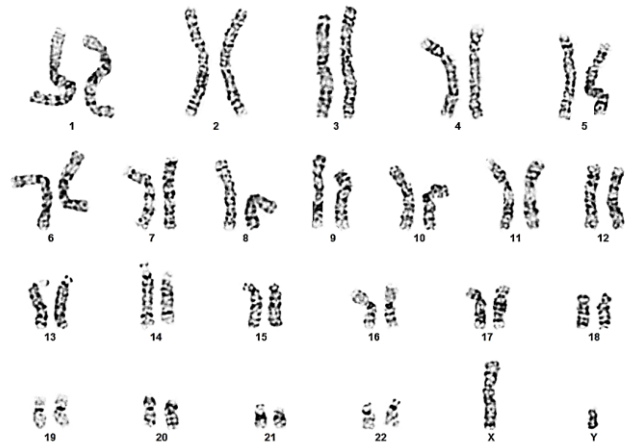

## E. hPSC Scorecard

| iPSCs      |      |       |       | Embryoid Bodies |      |      |      |
|------------|------|-------|-------|-----------------|------|------|------|
| Self-renew | Ecto | Meso  | Endo  | Self-renew      | Ecto | Meso | Endo |
| +          | -    | -     | -     | -               | +    | +    | +    |
| -0.19      | 0.14 | -0.15 | -1.05 | -6.74           | 2.08 | 1.07 | 0.64 |

## F. Morphology 11 days post-thaw

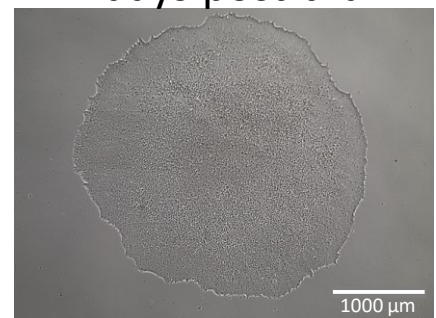

# sFig.19: Characterization for iPSC line EDi040-A

## A. AP

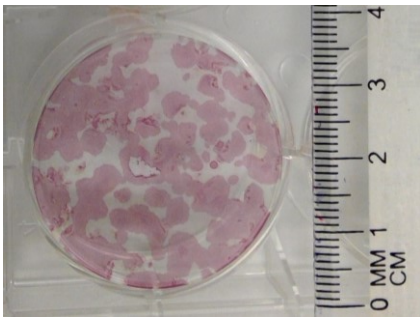

## B. Immunocytochemistry

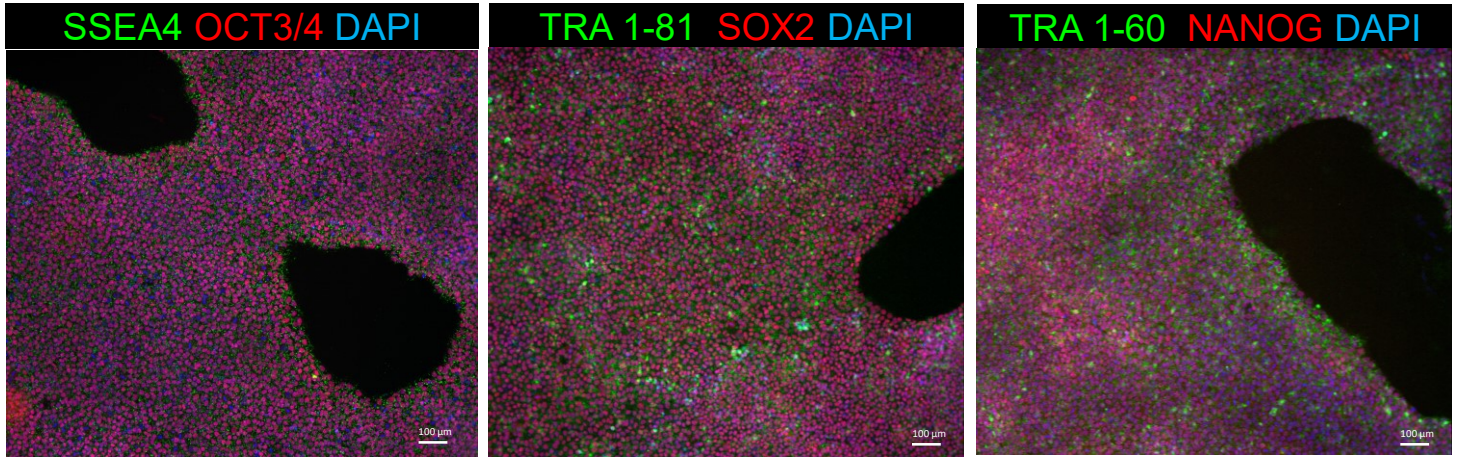

## C. Pluritest

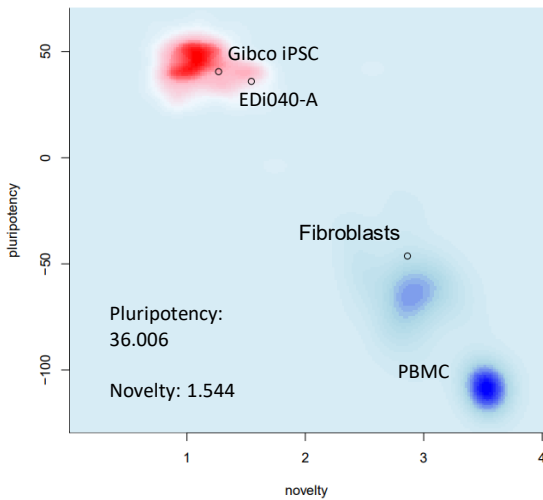

## D. G-Band karyotype

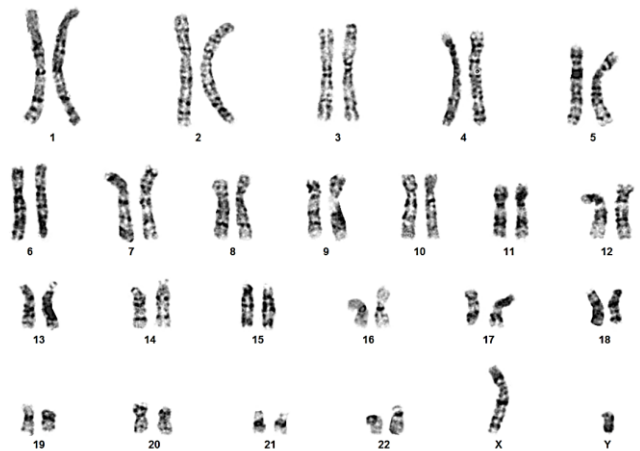

## E. hPSC Scorecard

| iPSCs      |       |      |       | Embryoid Bodies |      |      |       |
|------------|-------|------|-------|-----------------|------|------|-------|
| Self-renew | Ecto  | Meso | Endo  | Self-renew      | Ecto | Meso | Endo  |
| +          | -     | -    | -     | -               | +    | +    | +     |
| 0.01       | -0.45 | 0.24 | -0.94 | -3.18           | 1.57 | 0.98 | -0.56 |

## F. Morphology 2 days post-thaw

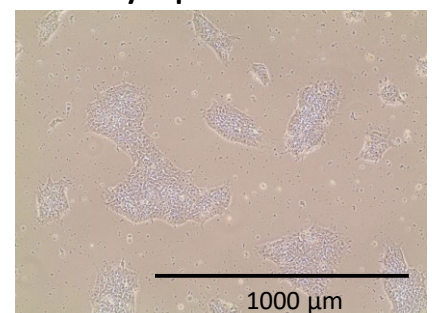

# sFig.20: Characterization for iPSC line EDi041-A

## A. AP

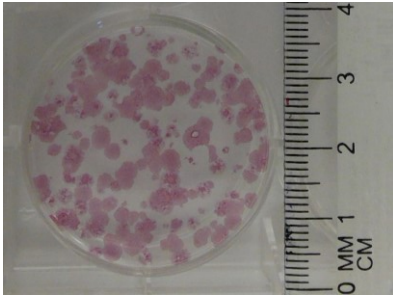

## B. Immunocytochemistry

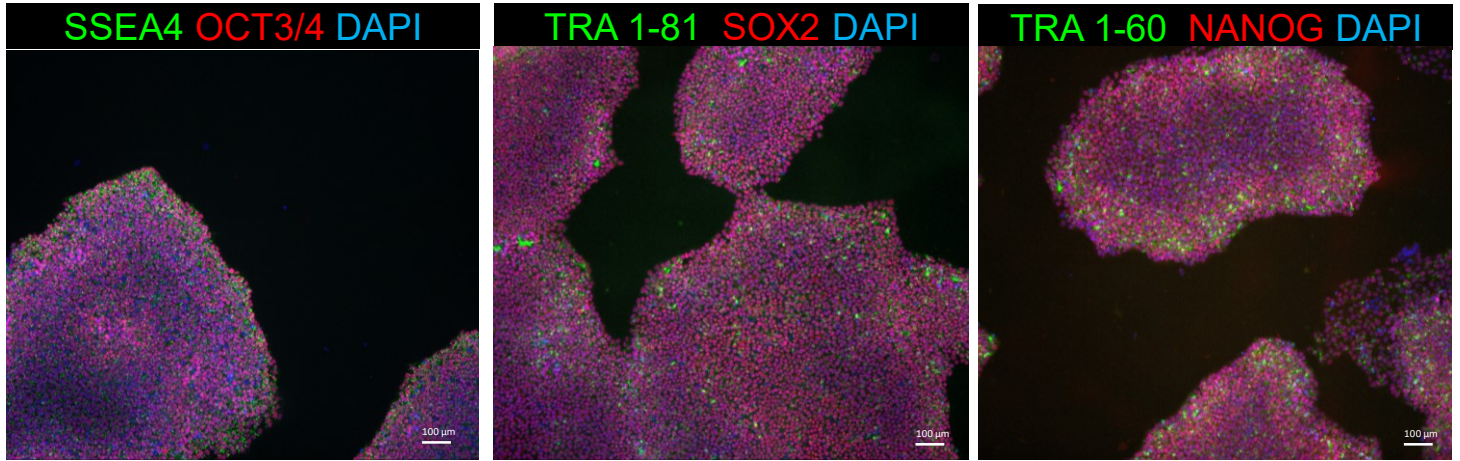

## C. Pluritest

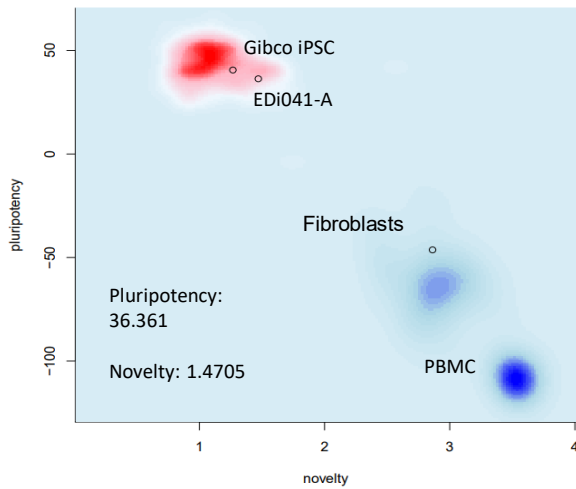

## D. G-Band karyotype

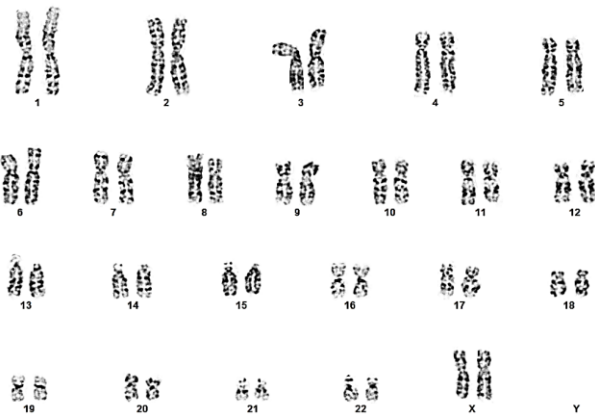

## E. hPSC Scorecard

| iPSCs      |      |       |       | Embryoid Bodies |      |      |      |
|------------|------|-------|-------|-----------------|------|------|------|
| Self-renew | Ecto | Meso  | Endo  | Self-renew      | Ecto | Meso | Endo |
| +          | -    | -     | -     | -               | +    | +    | +    |
| -0.18      | 0.05 | -0.32 | -1.24 | -7.04           | 1.61 | 1.42 | 0.67 |

## F. Morphology 3 days post-thaw

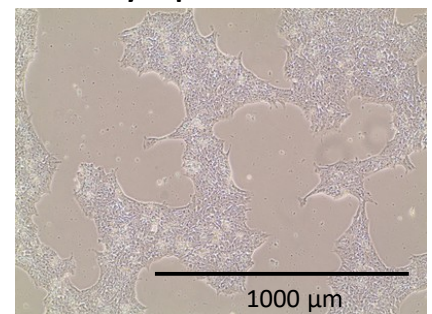

# sFig.21: Characterization for iPSC line EDi042-A

## A. AP

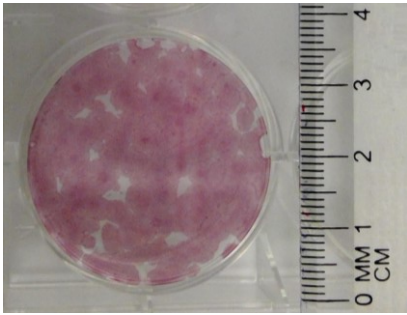

## B. Immunocytochemistry

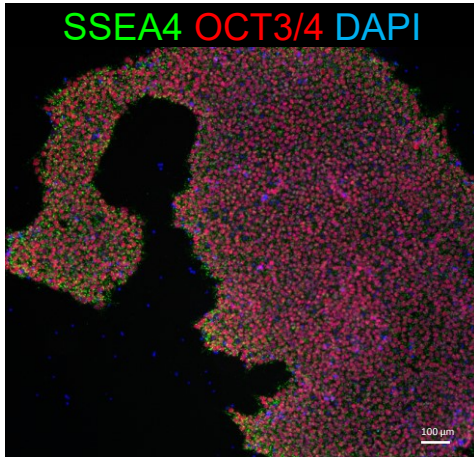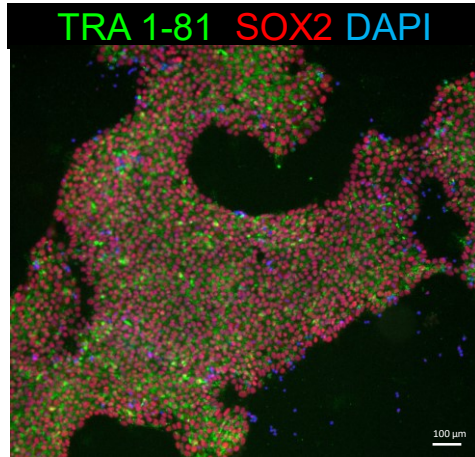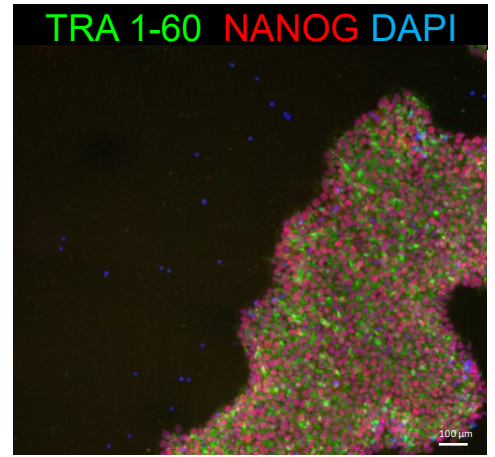

## C. Pluritest

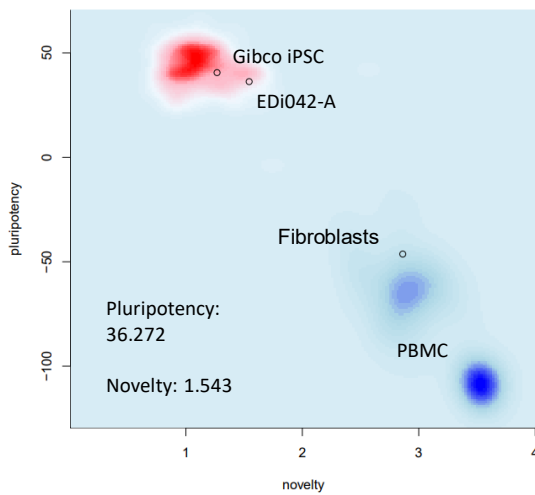

## D. G-Band karyotype

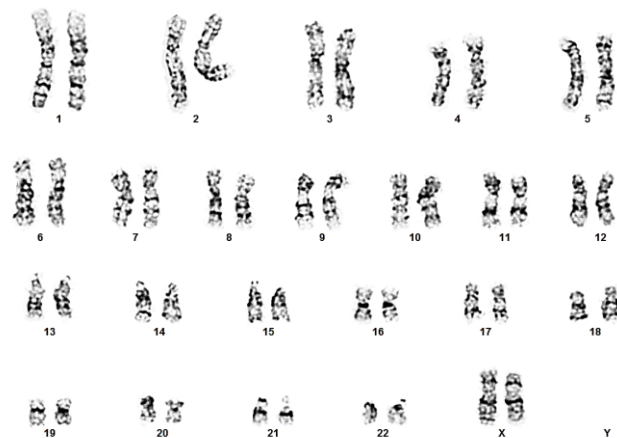

## E. hPSC Scorecard

| iPSCs      |       |      |       | Embryoid Bodies |      |      |      |
|------------|-------|------|-------|-----------------|------|------|------|
| Self-renew | Ecto  | Meso | Endo  | Self-renew      | Ecto | Meso | Endo |
| +          | -     | -    | -     | -               | +    | +    | -    |
| 0.05       | -0.13 | 0.05 | -1.04 | -5.15           | 2.62 | 1.07 | 0.22 |

## F. Morphology

4 days post-thaw

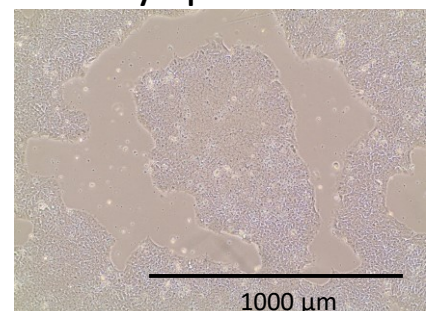

# sFig.22: Characterization for iPSC line EDi043-A

## A. AP

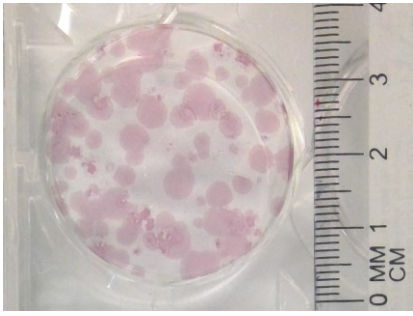

## B. Immunocytochemistry

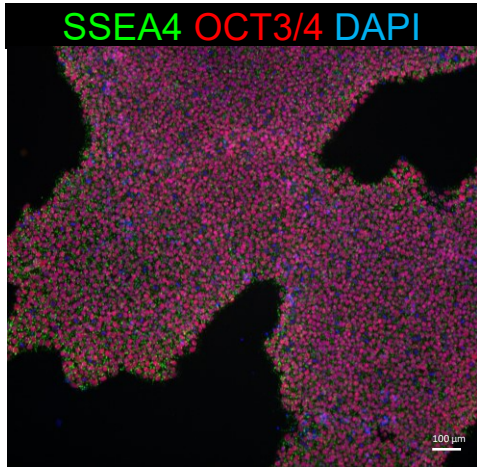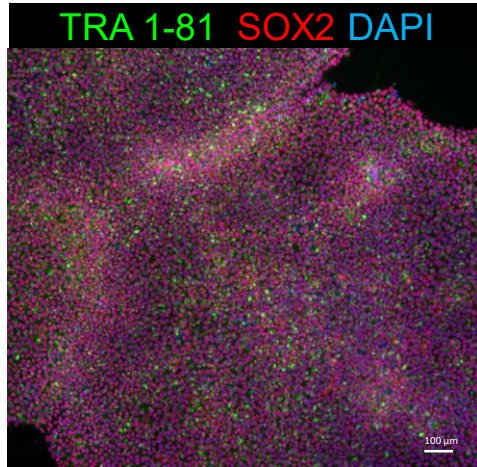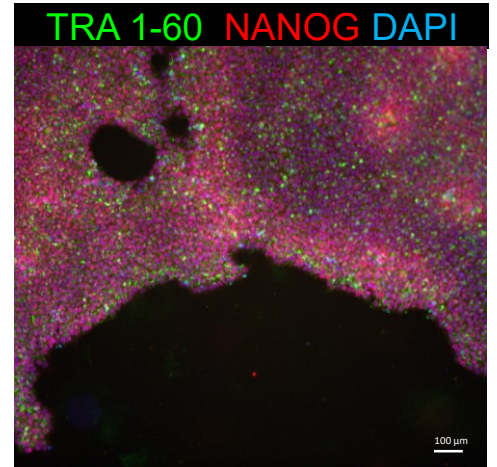

## C. Pluritest

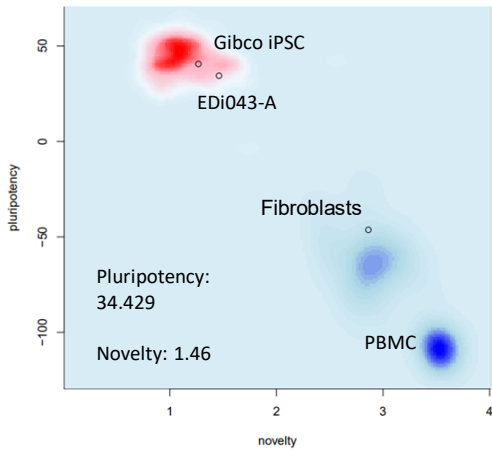

## D. G -Band karyotype

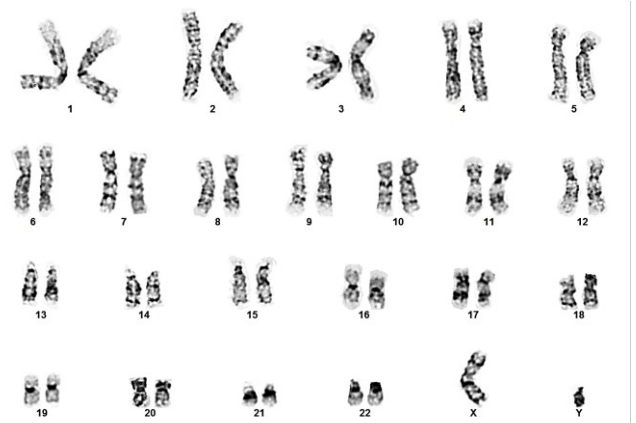

## E. hPSC Scorecard

| iPSCs      |      |      |       | Embryoid Bodies |      |      |      |
|------------|------|------|-------|-----------------|------|------|------|
| Self-renew | Ecto | Meso | Endo  | Self-renew      | Ecto | Meso | Endo |
| +          | -    | -    | -     | -               | +    | +    | +    |
| -0.03      | 0.38 | 0.07 | -1.23 | -6.46           | 1.59 | 2.57 | 1.19 |

## F. Morphology 7 days post-thaw

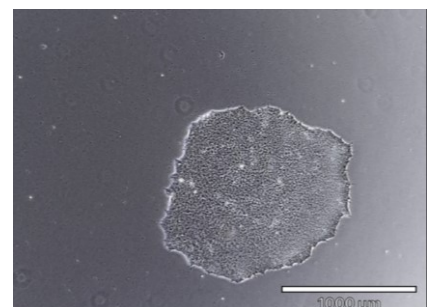

# sFig.23: Characterization for iPSC line EDi044-A

## A. AP

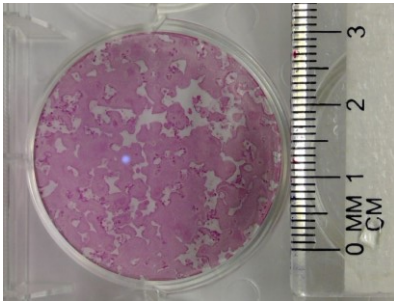

## B. Immunocytochemistry

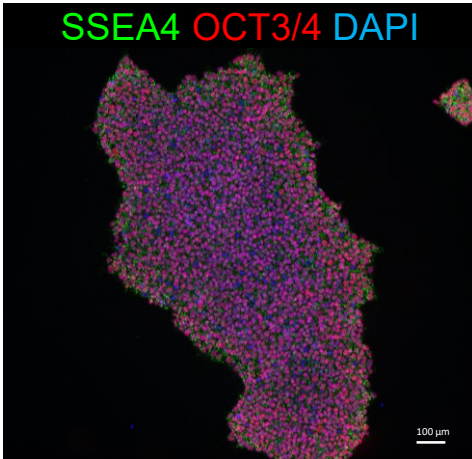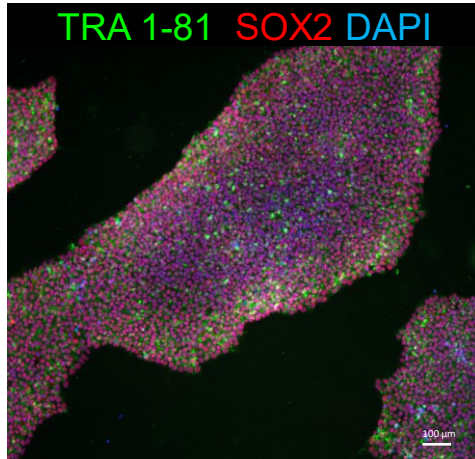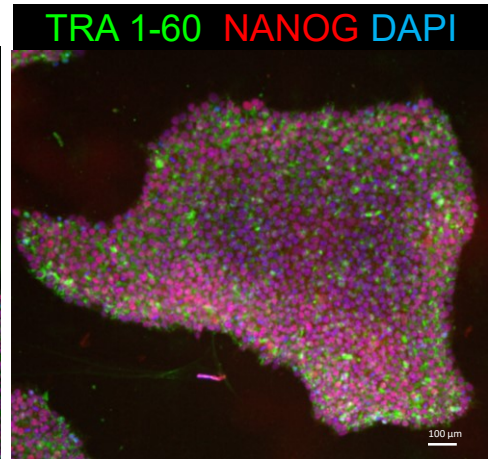

## C. Pluritest

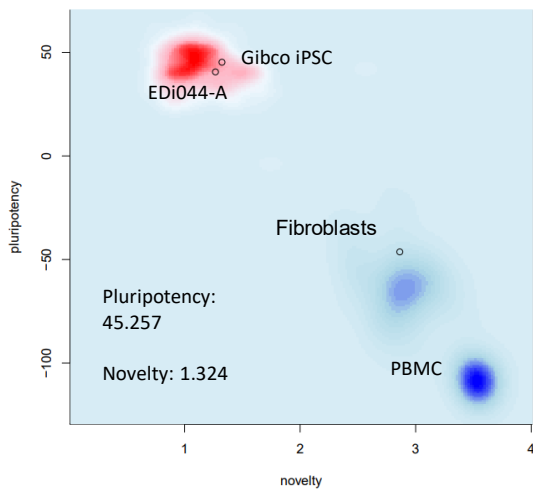

## D. G-Band karyotype

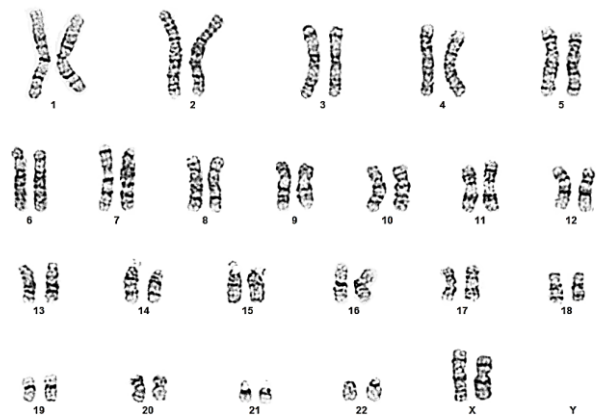

## E. hPSC Scorecard

| iPSCs      |       |      |       | Embryoid Bodies |      |      |      |
|------------|-------|------|-------|-----------------|------|------|------|
| Self-renew | Ecto  | Meso | Endo  | Self-renew      | Ecto | Meso | Endo |
| ○          | ⊖     | ⊖    | ⊖     | ⊖               | ⊕    | ⊕    | ⊕    |
| -0.75      | -0.19 | 0.58 | -0.80 | -6.29           | 1.65 | 3.42 | 0.94 |

## F. Morphology

4 days post-thaw

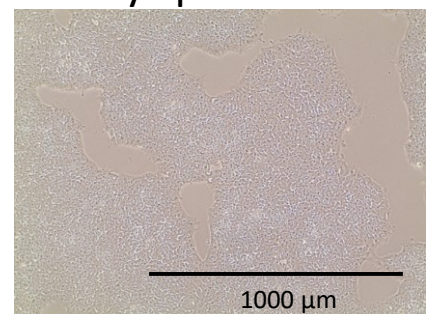

# sFig.24: Characterization for iPSC line EDi045-A

## A. AP

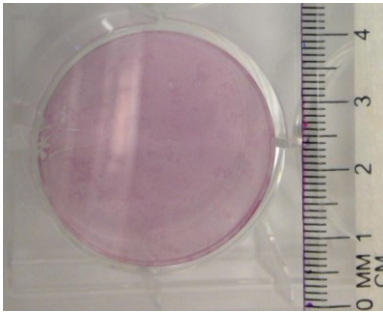

## B. Immunocytochemistry

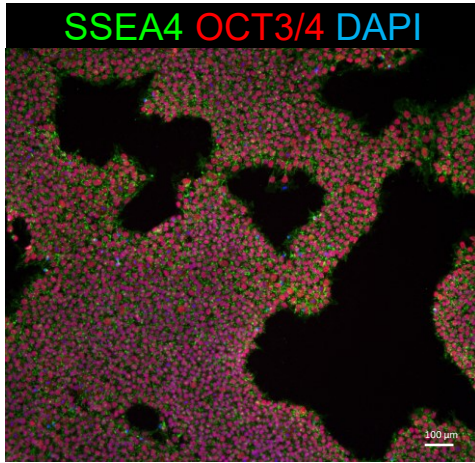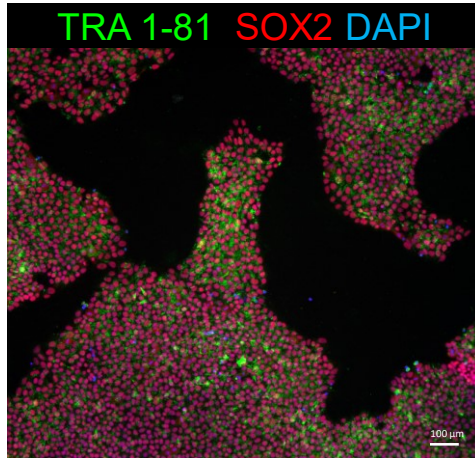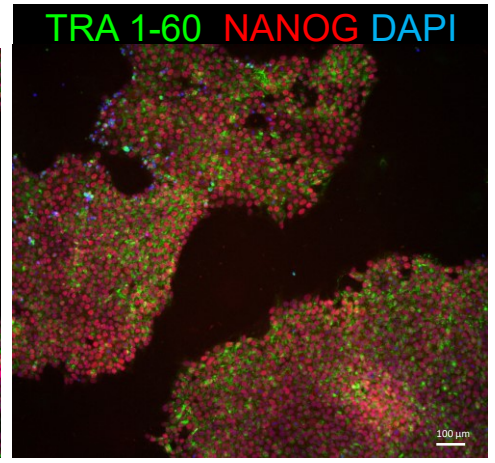

## C. Pluritest

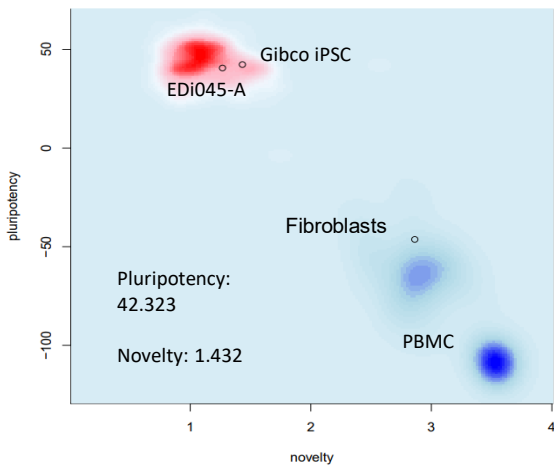

## D. G-Band karyotype

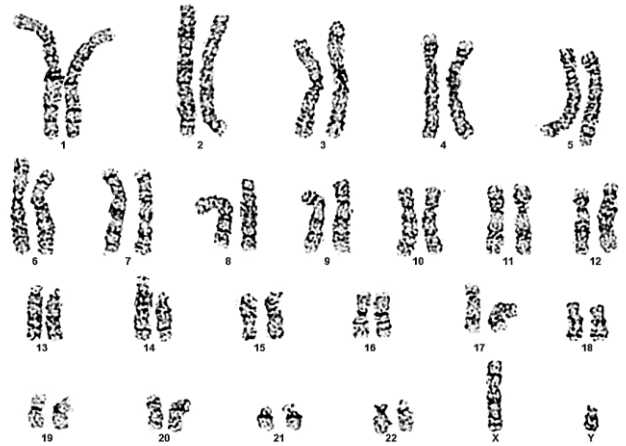

## E. hPSC Scorecard

| iPSCs      |      |      |       | Embryoid Bodies |      |      |      |
|------------|------|------|-------|-----------------|------|------|------|
| Self-renew | Ecto | Meso | Endo  | Self-renew      | Ecto | Meso | Endo |
| +          | -    | -    | -     | -               | +    | +    | +    |
| -0.11      | 0.15 | 0.22 | -0.81 | -6.43           | 2.29 | 1.53 | 0.62 |

## F. Morphology 14 days post-thaw

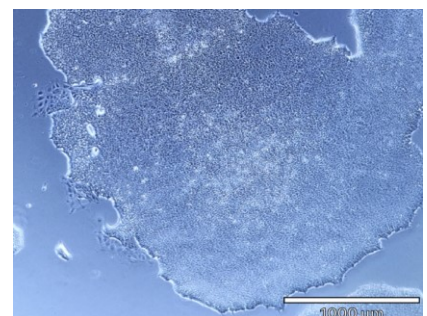



## sFig.25: EBNA assay for LBC lines

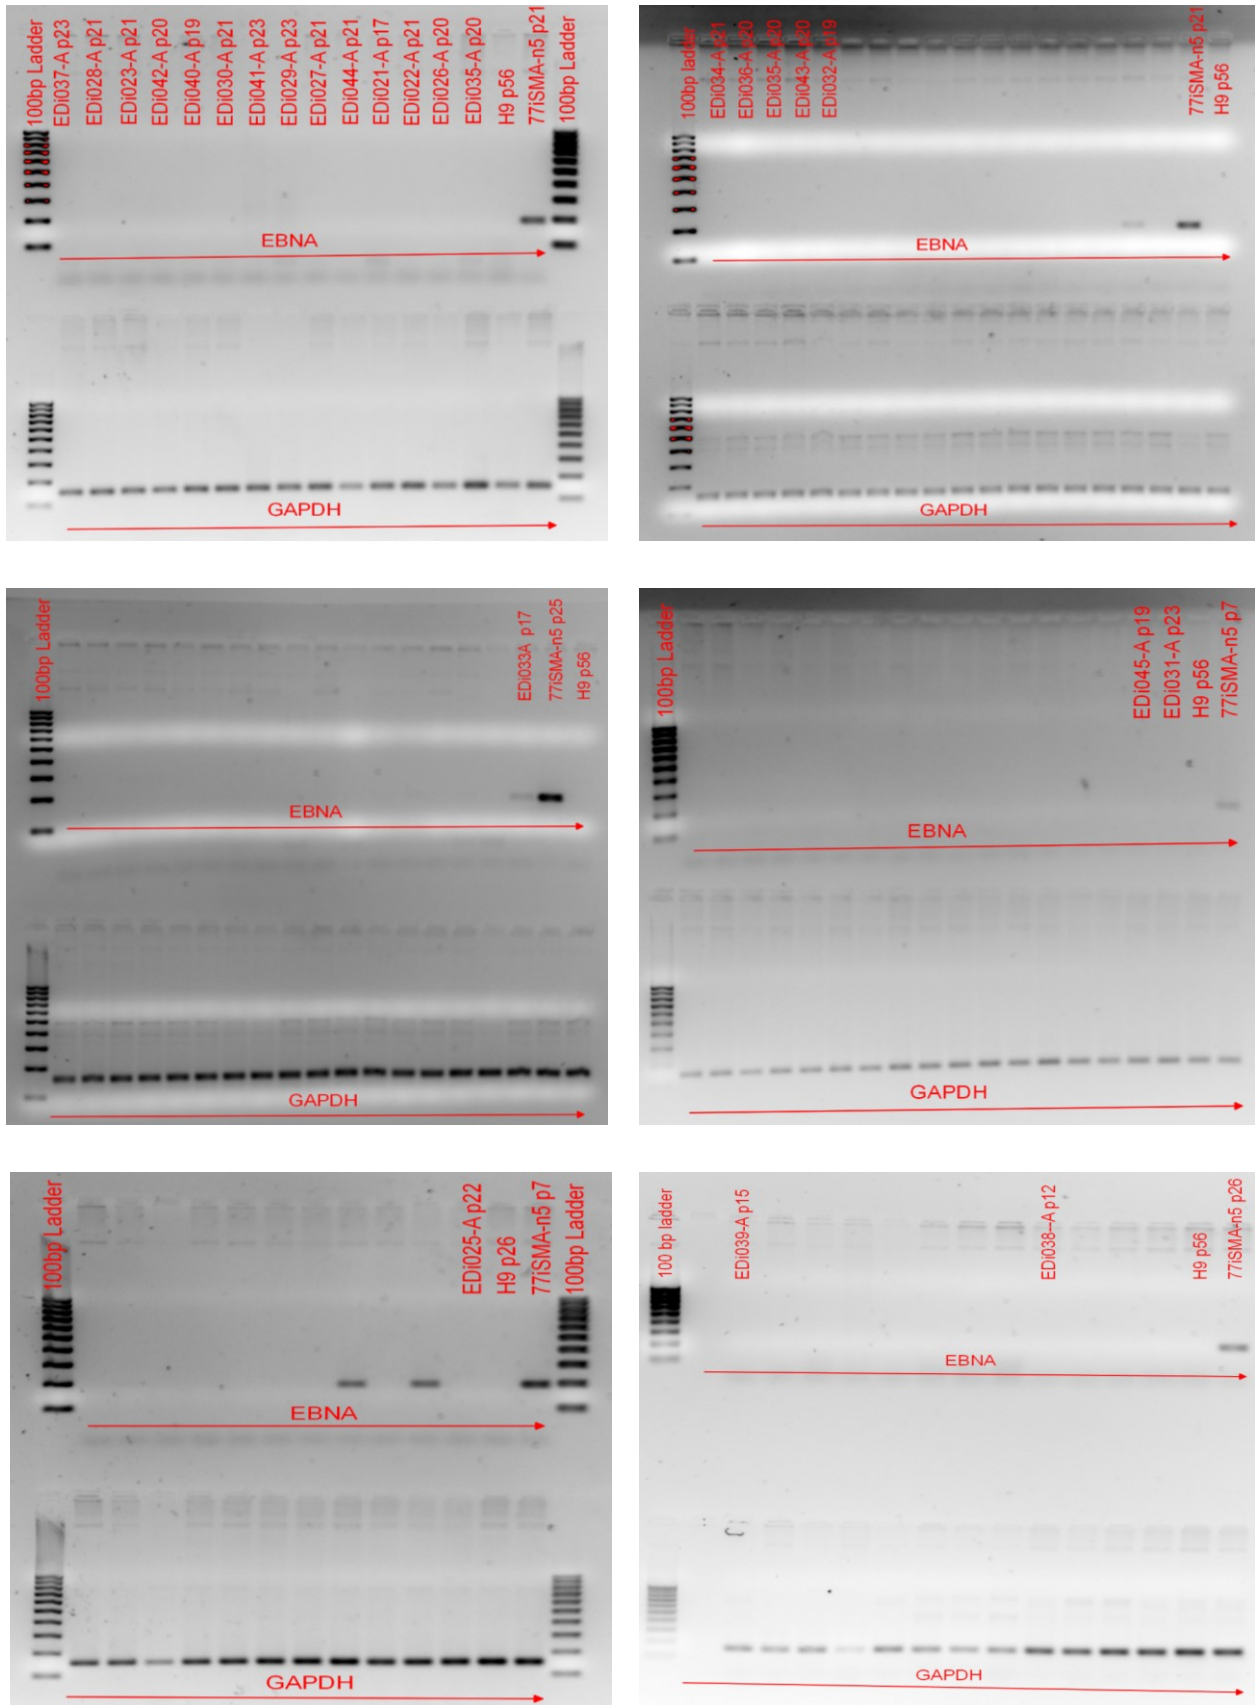

**sFig25:** 2% Agarose Gel images showing lack of EBNA persistence in all LBC iPSC lines. 77iSMA-n5 p21 = positive control iPSC for EBNA persistence. H9 p56 = Human ESC line H9, negative control for EBNA

## sFig.26: T-cell Clonality

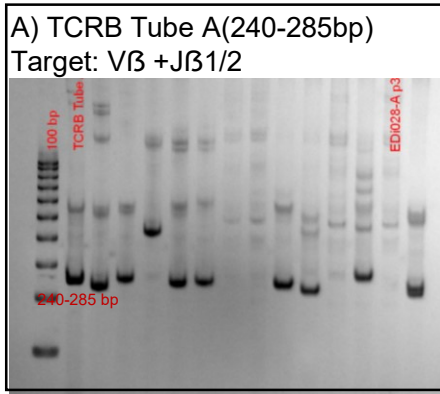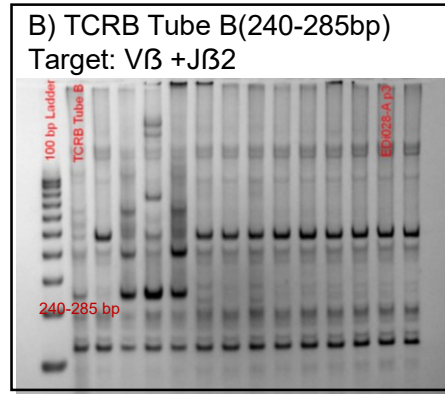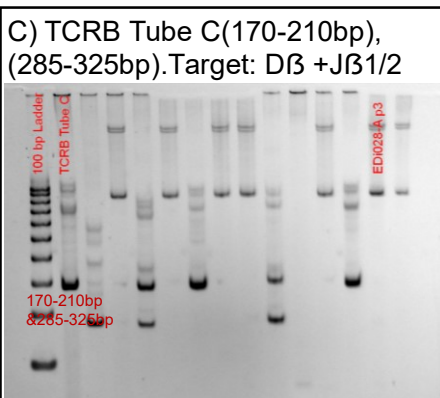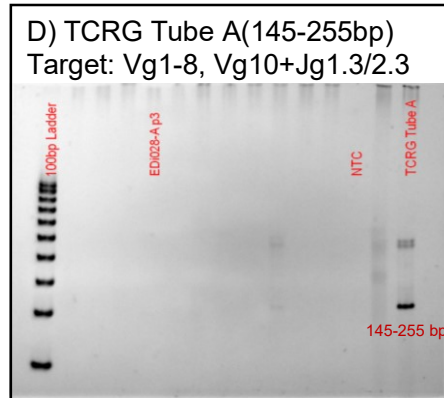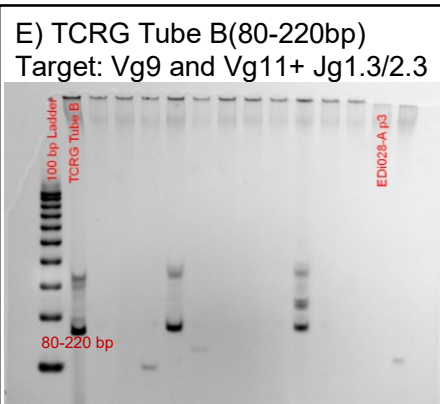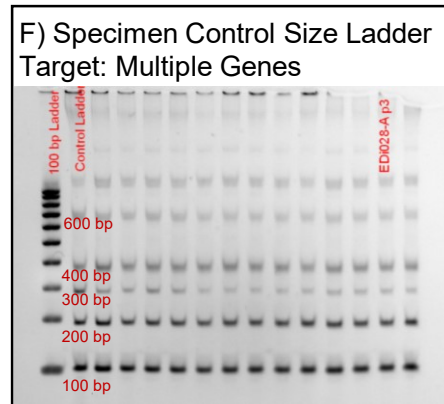

G)

| Line     | Passage | TCRB | TCRG |
|----------|---------|------|------|
| EDi021-A | p17     | +    | +    |
| EDi022-A | p4      | -    | -    |
| EDi023-A | p3      | -    | -    |
| EDi025-A | p25     | -    | -    |
| EDi026-A | p20     | -    | +    |
| EDi027-A | p5      | -    | -    |
| EDi028-A | p3      | -    | -    |
| EDi029-A | p4      | -    | -    |
| EDi030-A | p6      | -    | -    |
| EDi031-A | p23     | -    | -    |
| EDi032-A | p4      | -    | -    |
| EDi033-A | p17     | -    | -    |
| EDi034-A | p21     | -    | -    |
| EDi035-A | p4      | +    | +    |
| EDi036-A | p6      | -    | -    |
| EDi037-A | p6      | -    | -    |
| EDi038-A | p12     | -    | -    |
| EDi039-A | p7      | +    | +    |
| EDi040-A | p4      | -    | -    |
| EDi041-A | p4      | -    | -    |
| EDi042-A | p6      | -    | -    |
| EDi043-A | p3      | -    | -    |
| EDi044-A | p4      | -    | -    |
| EDi045-A | p19     | -    | -    |

**sFig26:** Data showing T-cell clonal lineage for LBC iPSCs. For each line, three targets (V $\beta$  +J $\beta$ 1/2, V $\beta$  +J $\beta$ 2 and D $\beta$  +J $\beta$ 1/2) were tested for T-Cell Receptor Beta Chain (TCRB), and two targets (Vg1-8, Vg10+Jg1.3/2.3; Vg9 and Vg11+ Jg1.3/2.3) for T-Cell Receptor Gamma Chain (TCRG). A-B-C) Representative 6% TBE Gel image for TCRB. D-E) Representative 6% TBE Gel image for TCRG. F) Representative 6% TBE Gel image for Control Genes. G) Table listing each of the LBC iPSC lines, indicating positivity (+) or negativity (-) for each of the T-cell receptors. Lines were considered positive if any band was present in any of the samples.

## sFig.27: Mycoplasma Testing

**A**  
**A**

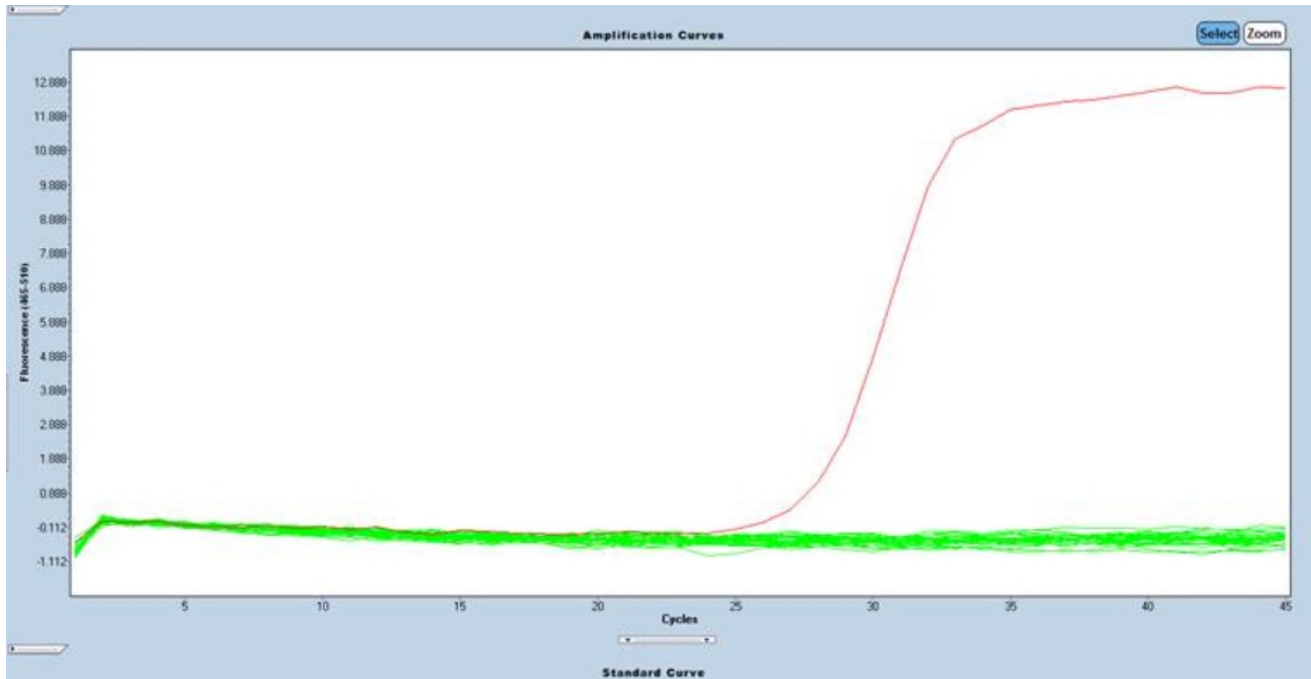

**B**

| Sample      | Passage | Luminescence Ratio | Mycoplasma |
|-------------|---------|--------------------|------------|
| +ve control |         | 48.78<br>(±25.06)  | -          |
| -ve control |         | 0.07<br>(±0.04)    | -          |
| EDi021-A    | p24     | 0.3                | -          |
| EDi022-A    | p13     | 0.52               | -          |
| EDi023-A    | p17     | 0.5                | -          |
| EDi025-A    | p23     | 0.5                | -          |
| EDi026-A    | p11     | 0.36               | -          |
| EDi027-A    | p13     | 0.45               | -          |
| EDi028-A    | p24     | 0.57               | -          |
| EDi029-A    | p14     | 0.38               | -          |
| EDi030-A    | p14     | 0.4                | -          |
| EDi031-A    | p29     | 0.45               | -          |
| EDi032-A    | p11     | 0.45               | -          |
| EDi033-A    |         |                    |            |
| EDi034-A    | p17     | 0.46               | -          |
| EDi035-A    | p17     | 0.47               | -          |
| EDi036-A    | p13     | 0.54               | -          |
| EDi037-A    | p20     | 0.39               | -          |
| EDi038-A    |         |                    |            |
| EDi039-A    |         |                    |            |
| EDi040-A    | p17     | 0.47               | -          |
| EDi041-A    | p38     | 0.19               | -          |
| EDi042-A    | p17     | 0.43               | -          |
| EDi043-A    |         |                    |            |
| EDi044-A    | p13     | 0.41               | -          |

**sFig.27:** Data showing the results of mycoplasma testing from iPSCs stored at two sites. **A)** PCR conducted by IDEXX BioAnalytics for samples provided by Cedars-Sinai Medical Center. All 24 LBC lines shown in green, positive control in red. **B)** Table showing results of MycoAlert Lonza LT07-318 assay conducted by Dementias Platform UK for available lines. Ratio values stated are the ratio of the luminescence signal of the kit substrate to that of the kit reagent. A ratio of 0-0.999 is negative for mycoplasma, 1–1.3 is borderline (requiring retest), and >1.3 is positive for mycoplasma. All samples tested at both sites were negative for mycoplasma.
